# Supplementary material for: Influence of Dietary Polyunsaturated Fatty Acid Intake on Potential Lipid Metabolite Diagnostic Markers in Renal Cell Carcinoma: A Case-Control Study
Source: MDPI journal article supplement (doi:10.3390/nu16091265), 2024-04-24
Supplement: s1 [file s1]

**Table S1.** Distribution of cancer diagnoses, sites, and stages at diagnosis of renal cell carcinoma.

| Diagnosis                        |                  | Total<br>(n=87) | Discovery set<br>(n=60) | Validation set<br>(n=27) |
|----------------------------------|------------------|-----------------|-------------------------|--------------------------|
| Renal cell carcinoma             | Clear cell type  | 80 (92.0)       | 57 (95.0)               | 23 (85.2)                |
|                                  | Chromophobe type | 4 (4.6)         | 1 (1.70)                | 3 (11.1)                 |
|                                  | Papillary type   | 2 (2.3)         | 1 (1.70)                | 1 (3.70)                 |
|                                  | Unclassified     | 1 (1.1)         | 1 (1.70)                | 0 (0.00)                 |
| Cancer site                      |                  |                 |                         |                          |
| Kidney, right                    |                  | 48 (55.2)       | 32 (53.3)               | 16 (59.3)                |
| Kidney, left                     |                  | 39 (44.8)       | 28 (46.7)               | 11 (40.7)                |
| T stage                          |                  |                 |                         |                          |
| 1a                               |                  | 62 (71.3)       | 43 (71.7)               | 19 (70.4)                |
| 1b                               |                  | 6 (6.9)         | 4 (6.70)                | 2 (7.40)                 |
| 2a                               |                  | 5 (5.7)         | 5 (8.30)                | 0 (0.00)                 |
| 2b                               |                  | 2 (2.3)         | 1 (1.70)                | 1 (3.70)                 |
| 3a                               |                  | 12 (13.8)       | 7 (11.7)                | 5 (18.5)                 |
| Pathology stage                  |                  |                 |                         |                          |
| N0                               |                  | 10 (11.5)       | 8 (13.3)                | 2 (7.4)                  |
| Nx                               |                  | 77 (88.5)       | 52 (86.7)               | 25 (92.6)                |
| Radical/Partial                  |                  |                 |                         |                          |
| Radical                          |                  | 20 (23.0)       | 14 (23.3)               | 5 (18.5)                 |
| Partial                          |                  | 67 (77.0)       | 46 (76.7)               | 22 (81.5)                |
| Fuhrman nuclear grade            |                  |                 |                         |                          |
| 1                                |                  | 1 (1.1)         | 1 (1.70)                | 0 (0.00)                 |
| 2                                |                  | 47 (54.0)       | 33 (55.0)               | 14 (51.9)                |
| 3                                |                  | 37 (42.5)       | 25 (41.7)               | 12 (44.4)                |
| 4                                |                  | 2 (2.3)         | 1 (1.70)                | 1 (3.70)                 |
| Tumor size                       |                  |                 |                         |                          |
| Longest diameter (cm)            |                  | 3.57 (3.08)     | 3.41 (2.50)             | 3.94 (4.12)              |
| Width (cm)                       |                  | 3.57 (3.08)     | 3.41 (2.50)             | 3.94 (4.12)              |
| Length (cm)                      |                  | 2.96 (2.70)     | 2.79 (1.99)             | 3.35 (3.87)              |
| High (cm)                        |                  | 2.39 (1.86)     | 2.38 (1.64)             | 2.42 (2.33)              |
| Margin(Only partial nephrectomy) |                  |                 |                         |                          |
| Surgical margin (negative)       |                  | 67 (100.0)      | 46 (100.0)              | 21(100.0)\$              |
| Safety margin (cm)               |                  | 0.15 (0.13)     | 0.14 (0.08)             | 0.17 (0.19)              |
| Necrosis                         |                  |                 |                         |                          |
| Tumor necrosis                   |                  | 48 (55.2)       | 33 (55.0)               | 15 (55.6)                |
| Necrosis rate %                  |                  | 14.5 (20.5)     | 11.2 (15.1)             | 21.9 (28.3)              |
| Existence of cancer invasion     |                  |                 |                         |                          |
| Renal capsule                    |                  | 41 (47.1)       | 27 (45.0)               | 14 (51.9)                |
| Perirenal fat                    |                  | 3 (3.4)         | 2 (3.30)                | 1 (3.70)                 |
| Renal sinus fat                  |                  | 4 (4.6)         | 3 (5.00)                | 1 (3.70)                 |
| Lymphatic                        |                  | 0 (0.0)         | 0 (0.00)                | 0 (0.00)                 |
| Venous                           |                  | 7 (8.0)         | 4 (6.70)                | 3 (11.1)                 |
| Perineural                       |                  | 0 (0.0)         | 0 (0.00)                | 0 (0.00)                 |
| Collecting system                |                  | 20 (23.0)       | 13 (21.7)               | 7 (25.9)                 |

Data are presented as mean (standard deviation) for continuous variables and n (%) for categorical variables.

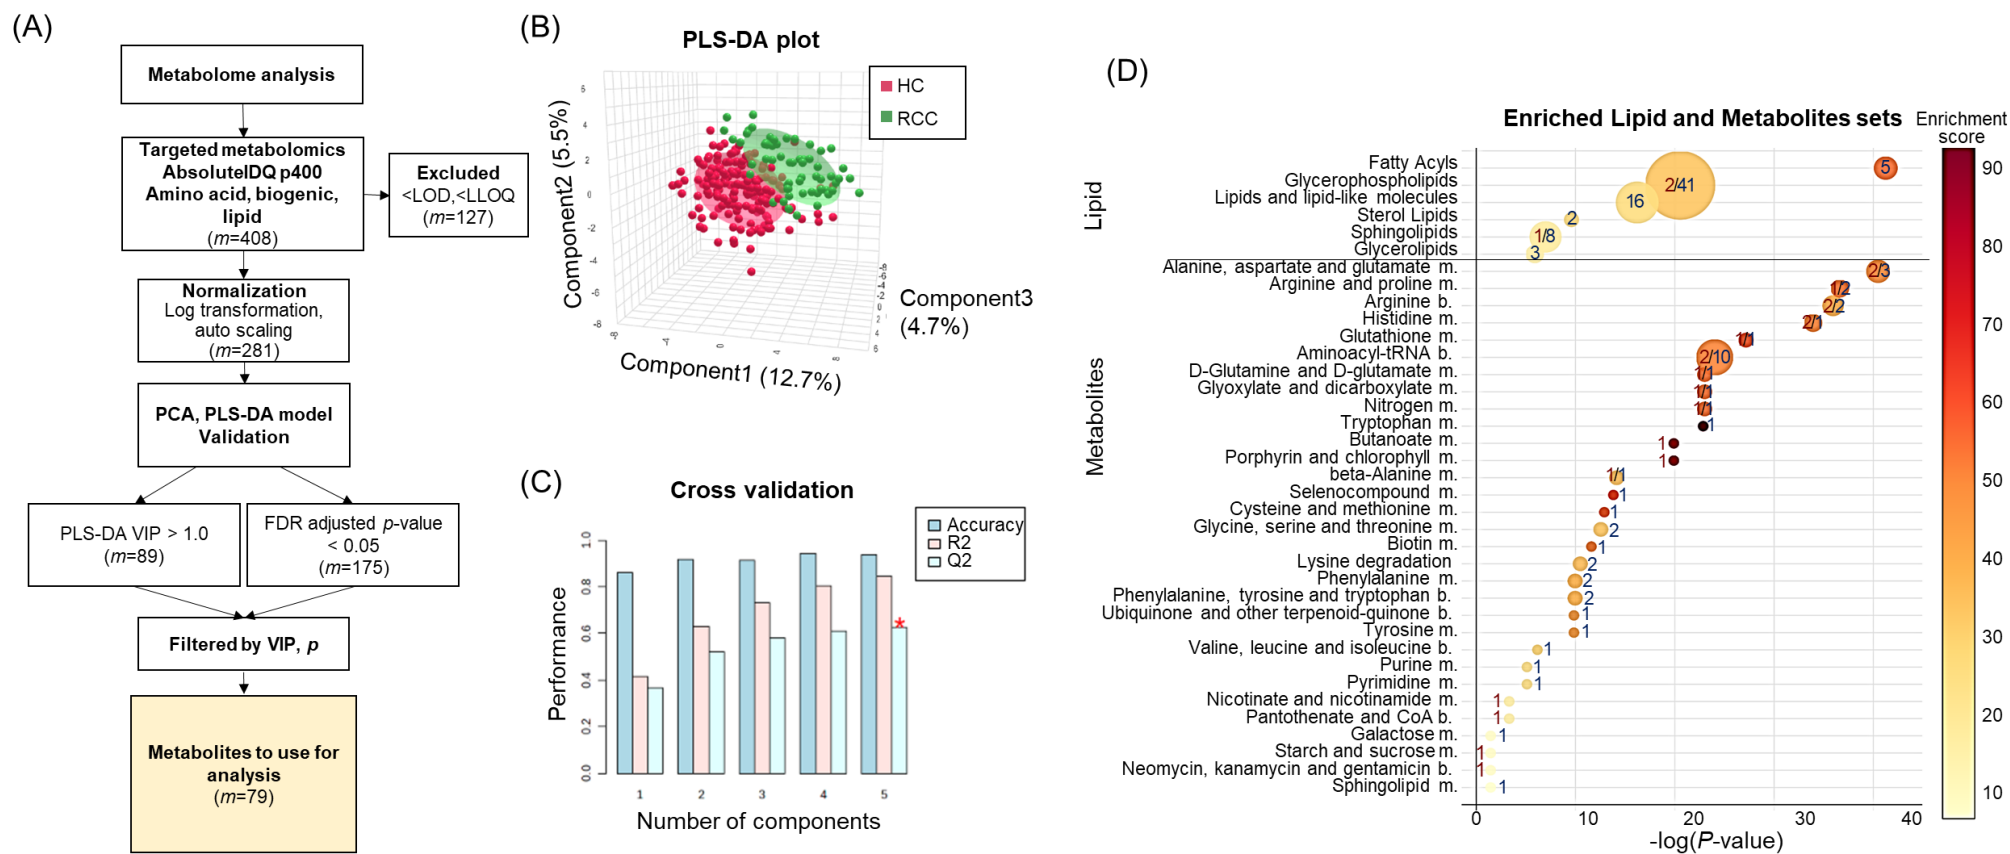

**Figure S1.** Metabolite data validation and principal enrichment, along with the network of 79 metabolites

(A) Flow chart of metabolomics analysis. (B) PLS-DA plot between healthy control(HC) and Renal cell carcinoma (RCC) groups using all metabolites. (C) Accuracy, R2, and Q2 of Ten-fold cross-validation. (D) Enrichment analysis based on lipid and metabolite metabolism. The horizontal axis represents the negative logarithm of the p-value for enrichment. The size of each circle represents the number of hits for the corresponding lipid or metabolism. An increase in the relative abundance in RCC compared to that in HC is indicated by a red number, whereas a decrease in RCC is indicated by a blue number. The figure was generated using the Cytoscape CyPlot application. Abbreviation: m; metabolites, b; biosynthesis. Normalization by QC sample, log transformation, and autoscaling.

**Table S2.** Seventy-nine statistically significant metabolites between HC and RCC groups

|    | Compound name                 | Short name    | CAS          | HMDB ID     | Pubchem CID | VIP    | FDR adjusted p-value | Fold change | log2fold | Class                    | Updown (RCC /HC) |
|----|-------------------------------|---------------|--------------|-------------|-------------|--------|----------------------|-------------|----------|--------------------------|------------------|
| 1  | LysoPC(16:0)                  | LPC(16:0)     |              | HMDB0010382 | 460602      | 1.2260 | 1.50.E-18            | 0.7133      | -0.4874  | Lysophosphatidylcholines | Down             |
| 2  | L-Tryptophan                  | Trp           | 73-22-3      | HMDB0000929 | 6305        | 1.2841 | 3.04.E-18            | 0.7468      | -0.4212  | Amino acids              | Down             |
| 3  | LysoPC(18:0)                  | LPC(18:0)     |              | HMDB0010384 | 497299      | 1.2599 | 4.69.E-17            | 0.6856      | -0.5446  | Lysophosphatidylcholines | Down             |
| 4  | Decanoylcarnitine             | AC(10:0)      | 1492-27-9    | HMDB0000651 | 10245190    | 2.9754 | 1.73.E-16            | 0.3276      | -1.6100  | Acylcarnitines           | Down             |
| 5  | LysoPC(18:2(9Z,12Z))          | LPC(18:2)     | 22252-07-9   | HMDB0010386 | 11005824    | 1.5542 | 8.46.E-16            | 0.6366      | -0.6515  | Lysophosphatidylcholines | Down             |
| 6  | PC(16:0/20:2(11Z,14Z))        | PC(36:2)      |              | HMDB0007979 | 52922420    | 1.1484 | 1.86.E-14            | 0.7270      | -0.4600  | Phosphatidylcholines     | Down             |
| 7  | LysoPC(18:1(9Z))              | LPC(18:1)     | 3542-29-8    | HMDB0002815 | 16081932    | 1.1855 | 1.34.E-13            | 0.7116      | -0.4908  | Lysophosphatidylcholines | Down             |
| 8  | L-Asparagine                  | Asn           | 70-47-3      | HMDB0000168 | 6267        | 1.1231 | 3.88.E-13            | 0.8249      | -0.2778  | Amino acids              | Down             |
| 9  | L-Alanine                     | Ala           | 56-41-7      | HMDB0000161 | 5950        | 1.1808 | 3.14.E-12            | 0.7616      | -0.3929  | Amino acids              | Down             |
| 10 | L-Glutamic acid               | Glu           | 56-86-0      | HMDB0000148 | 33032       | 2.0690 | 1.70.E-11            | 1.4753      | 0.5610   | Amino acids              | Up               |
| 11 | L-Methionine                  | Met           | 63-68-3      | HMDB0000696 | 6137        | 1.0039 | 1.58.E-10            | 0.8135      | -0.2977  | Amino acids              | Down             |
| 12 | 9-Decenoylcarnitine           | AC(10:1)      |              | HMDB0013205 | 53481699    | 2.7108 | 1.62.E-10            | 0.0768      | -3.7028  | Acylcarnitines           | Down             |
| 13 | LysoPC(20:3(5Z,8Z,11Z))       | LPC(20:3)     | 1199257-41-4 | HMDB0010393 | 53480467    | 1.3236 | 1.03.E-09            | 0.5661      | -0.8208  | Lysophosphatidylcholines | Down             |
| 14 | DG(14:0/0:0/18:1n9)           | DG(32:1)      |              | HMDB0055962 |             | 1.9332 | 1.33.E-08            | 0.2793      | -1.8402  | Diglycerides             | Down             |
| 15 | LysoPC(P-16:0)                | LPC-O(16:1)   |              | HMDB0010407 | 10917802    | 1.7038 | 2.52.E-08            | 0.4337      | -1.2053  | Lysophosphatidylcholines | Down             |
| 16 | 4-Hydroxyproline              | t4-OH-Pro     | 51-35-4      | HMDB0000725 | 5810        | 1.3031 | 3.36.E-08            | 0.6170      | -0.6968  | Biogenic amines          | Down             |
| 17 | TG(14:0/14:1(9Z)/16:1(9Z))    | TG(44:2)      |              |             | 56937930    | 1.5862 | 4.52.E-08            | 0.2618      | -1.9337  | Triglycerides            | Down             |
| 18 | L-Octanoylcarnitine           | AC(8:0)       | 25243-95-2   | HMDB0000791 | 11953814    | 1.8578 | 7.74.E-08            | 0.3419      | -1.5484  | Acylcarnitines           | Down             |
| 19 | LysoPC(17:0)                  | LPC(17:0)     | 50930-23-9   | HMDB0012108 | 24779463    | 1.5984 | 1.06.E-07            | 0.4399      | -1.1848  | Lysophosphatidylcholines | Down             |
| 20 | TG(14:0/14:0/16:1(9Z))        | TG(44:1)      |              | HMDB0042069 |             | 1.9045 | 1.53.E-07            | 0.4282      | -1.2236  | Triglycerides            | Down             |
| 21 | DG(18:0/24:1(15Z)/0:0)        | DG(42:1)      |              | HMDB0007181 | 53478056    | 1.0256 | 1.58.E-07            | 0.7031      | -0.5082  | Diglycerides             | Down             |
| 22 | 2-Octenoylcarnitine           | AC(8:1)       |              | HMDB0013324 | 70679121    | 1.8132 | 4.02.E-07            | 0.3187      | -1.6496  | Acylcarnitines           | Down             |
| 23 | PC(o-18:1(11Z)/18:2(9Z,12Z))  | PC-O(36:3)    |              | HMDB0013425 | 53481721    | 1.0602 | 5.97.E-07            | 0.7606      | -0.3948  | Phosphatidylcholines     | Down             |
| 24 | Sarcosine                     | Sarcosine     | 107-97-1     | HMDB0000271 | 1088        | 1.6049 | 8.39.E-07            | 0.5800      | -0.7858  | Biogenic amines          | Down             |
| 25 | TG(15:0/18:2(9Z,12Z)/20:3n6)  | TG(53:5)      |              |             | 56938956    | 1.6340 | 8.71.E-07            | 0.5994      | -0.7384  | Triglycerides            | Down             |
| 26 | DG(16:0/0:0/18:3n6)           | DG(34:3)      |              |             |             | 1.7955 | 1.03.E-06            | 0.5382      | -0.8937  | Diglycerides             | Down             |
| 27 | PC(o-16:1(9Z)/18:2(9Z,12Z))   | PC-O(34:3)    |              | HMDB0013413 | 53481709    | 1.0221 | 1.08.E-06            | 0.7554      | -0.4047  | Phosphatidylcholines     | Down             |
| 28 | SM(d18:1/26:0)                | SM(44:1)      |              |             | 44260129    | 1.4306 | 1.78.E-06            | 0.6543      | -0.6119  | Sphingomyelins           | Down             |
| 29 | PC(o-16:1(9Z)/16:1(9Z))       | PC-O(32:2)    |              | HMDB0013411 | 53481705    | 1.8205 | 2.31.E-06            | 0.2960      | -1.7563  | Phosphatidylcholines     | Down             |
| 30 | PC(O-16:0/18:2(9Z,12Z))       | PC-O(34:2)    | 88542-95-4   | HMDB0011151 | 6443157     | 1.0041 | 2.65.E-06            | 0.7579      | -0.3999  | Phosphatidylcholines     | Down             |
| 31 | Butyrylcarnitine              | AC(4:0)       | 25576-40-3   | HMDB0002013 | 213144      | 1.6043 | 2.70.E-06            | 0.4733      | -1.0791  | Acylcarnitines           | Down             |
| 32 | LysoPC(16:1(9Z))              | LPC(16:1)     | 76790-27-7   | HMDB0010383 | 24779461    | 1.1224 | 3.62.E-06            | 0.7120      | -0.4900  | Lysophosphatidylcholines | Down             |
| 33 | sphingomyelin 43:1            | SM(43:1)      |              |             |             | 1.0198 | 1.15.E-05            | 0.6813      | -0.5536  | Sphingomyelins           | Down             |
| 34 | TG(14:0/20:2n6/14:0)          | TG(48:2)      |              |             |             | 1.3485 | 1.53.E-05            | 0.6204      | -0.6888  | Triglycerides            | Down             |
| 35 | TG(16:1(9Z)/14:0/16:1(9Z))    | TG(46:2)      |              | HMDB0010419 | 53480484    | 1.7581 | 1.63.E-05            | 0.5184      | -0.9479  | Triglycerides            | Down             |
| 36 | DG(16:1n7/0:0/16:1n7)         | DG(32:2)      |              |             |             | 1.3428 | 2.29.E-05            | 0.2173      | -2.2022  | Diglycerides             | Down             |
| 37 | DG(18:1(11Z)/24:1(15Z)/0:0)   | DG(42:2)      |              | HMDB0007210 | 53478085    | 1.3422 | 2.38.E-05            | 0.5918      | -0.7569  | Diglycerides             | Down             |
| 38 | phosphatidylcholine 43:2      | PC(21:0/22:2) |              |             |             | 2.0016 | 4.96.E-05            | 3.9119      | 1.9679   | Phosphatidylcholines     | Up               |
| 39 | Ceramide (d18:1/22:0)         | Cer(40:1)     |              |             |             | 1.3868 | 1.62.E-04            | 0.4585      | -1.1249  | Ceramide                 | Down             |
| 40 | TG(15:0/18:3(6Z,9Z,12Z)/15:0) | TG(48:3)      |              |             |             | 2.3950 | 1.98.E-04            | 0.5679      | -0.8164  | Triglycerides            | Down             |

|    |                                               |                        |            |             |          |        |           |        |         |                      |      |
|----|-----------------------------------------------|------------------------|------------|-------------|----------|--------|-----------|--------|---------|----------------------|------|
| 41 | TG(16:0/22:6(4Z,7Z,10Z,13Z,16Z,19Z)/16:0)     | TG(54:6)               |            |             |          | 1.0115 | 2.06.E-04 | 0.7800 | -0.3585 | Triglycerides        | Down |
| 42 | DG(18:1(11Z)/16:0/0:0)                        | DG(34:1)               |            |             | 5283470  | 1.0522 | 2.26.E-04 | 0.7375 | -0.4394 | Diglycerides         | Down |
| 43 | PC(22:1(13Z)/22:6(4Z,7Z,10Z,13Z,16Z,19Z))     | PC(44:7)               |            |             | 52923545 | 1.1948 | 2.98.E-04 | 0.6228 | -0.6832 | Phosphatidylcholines | Down |
| 44 | TG(16:1(9Z)/16:1(9Z)/20:3n6)                  | TG(52:3)               |            |             | 9544149  | 1.0132 | 2.98.E-04 | 0.7765 | -0.3649 | Triglycerides        | Down |
| 45 | SM(d18:1/22:0)                                | SM(40:1)               |            | HMDB0012103 | 44260125 | 1.8136 | 3.21.E-04 | 1.2974 | 0.3756  | Sphingomyelins       | Up   |
| 46 | Cer(d18:1/24:1(15Z))                          | Cer(42:2)              |            | HMDB0004953 | 5283568  | 1.1832 | 5.38.E-04 | 0.7489 | -0.4172 | Ceramide             | Down |
| 47 | TG(15:0/15:0/20:3n6)                          | TG(50:3)               |            | HMDB0043006 |          | 1.1799 | 5.56.E-04 | 0.7722 | -0.3729 | Triglycerides        | Down |
| 48 | phosphatidylcholine O-37:6                    | PC-O(37:6)             |            |             |          | 1.6559 | 5.59.E-04 | 0.2905 | -1.7834 | Phosphatidylcholines | Down |
| 49 | TG(14:0/20:1(11Z)/15:0)                       | TG(49:1)               |            |             |          | 1.1318 | 8.21.E-04 | 0.6985 | -0.5176 | Triglycerides        | Down |
| 50 | TG(15:0/18:1(9Z)/22:6(4Z,7Z,10Z,13Z,16Z,19Z)) | TG(55:7)               |            |             | 56938947 | 2.3958 | 1.56.E-03 | 0.5326 | -0.9089 | Triglycerides        | Down |
| 51 | Methionine sulfoxide                          | MetO                   | 3226-65-1  | HMDB0002005 | 158980   | 1.2229 | 1.74.E-03 | 0.5470 | -0.8704 | Amino acids          | Down |
| 52 | TG(16:0/16:1(9Z)/18:1(9Z))                    | TG(50:2)               |            | HMDB0005377 | 9544011  | 1.1446 | 2.53.E-03 | 0.7748 | -0.3682 | Triglycerides        | Down |
| 53 | TG(15:0/22:2(13Z,16Z)/18:4(6Z,9Z,12Z,15Z))    | TG(55:6)               |            |             |          | 2.4109 | 2.85.E-03 | 0.5350 | -0.9023 | Triglycerides        | Down |
| 54 | TG(15:0/18:1(9Z)/16:1(9Z))                    | TG(49:2)               |            |             |          | 1.5734 | 2.97.E-03 | 0.6854 | -0.5450 | Triglycerides        | Down |
| 55 | DG(16:0/22:0/0:0)                             | DG(38:0)               |            | HMDB0007115 | 9543762  | 1.2072 | 2.97.E-03 | 0.6646 | -0.5895 | Diglycerides         | Down |
| 56 | L-Aspartic acid                               | Asp                    | 56-84-8    | HMDB0000191 | 5960     | 1.0024 | 2.97.E-03 | 1.5470 | 0.6295  | Amino acids          | Up   |
| 57 | TG(14:0/22:2(13Z,16Z)/15:0)                   | TG(51:2)               |            |             |          | 1.0802 | 3.01.E-03 | 0.7923 | -0.3358 | Triglycerides        | Down |
| 58 | DG(16:0/20:4(5Z,8Z,11Z,14Z)/0:0)              | DG(36:4)               |            | HMDB0007112 | 9543736  | 1.1055 | 3.16.E-03 | 0.7941 | -0.3327 | Diglycerides         | Down |
| 59 | Linoelaidyl carnitine                         | Linoelaidyl carnitine  | 85114-47-2 | HMDB0006461 |          | 1.1124 | 3.30.E-03 | 0.4040 | -1.3074 | Acylcarnitines       | Down |
| 60 | PC(14:0/18:3(9Z,12Z,15Z))                     | PC(32:3)               |            | HMDB0007876 | 24778625 | 1.3708 | 3.32.E-03 | 0.6776 | -0.5614 | Phosphatidylcholines | Down |
| 61 | TG(14:0/22:0/14:1(9Z))                        | TG(50:1)               |            |             |          | 1.0962 | 3.32.E-03 | 0.7515 | -0.4122 | Triglycerides        | Down |
| 62 | TG(14:0/22:4(7Z,10Z,13Z,16Z)/15:0)            | TG(51:4)               |            |             |          | 1.1997 | 4.19.E-03 | 0.7958 | -0.3295 | Triglycerides        | Down |
| 63 | TG(14:0/16:1(9Z)/20:3n6)                      | TG(50:4)               |            |             | 56938050 | 1.1815 | 6.77.E-03 | 0.7745 | -0.3687 | Triglycerides        | Down |
| 64 | TG(14:0/22:5(4Z,7Z,10Z,13Z,16Z)/15:0)         | TG(51:5)               |            |             |          | 1.3946 | 7.04.E-03 | 0.6217 | -0.6858 | Triglycerides        | Down |
| 65 | phosphatidylcholine O-32:3                    | PC-O(32:2)             |            |             | 24779281 | 1.7791 | 8.40.E-03 | 0.6085 | -0.7168 | Phosphatidylcholines | Down |
| 66 | TG(14:0/20:0/14:1(9Z))                        | TG(48:1)               |            |             |          | 1.1588 | 8.51.E-03 | 0.6585 | -0.6027 | Triglycerides        | Down |
| 67 | TG(15:0/16:1(9Z)/22:5(4Z,7Z,10Z,13Z,16Z))     | TG(53:6)               |            |             | 56938840 | 2.1942 | 9.71.E-03 | 0.6554 | -0.6096 | Triglycerides        | Down |
| 68 | TG(15:0/16:0/20:3n6)                          | TG(51:3)               |            |             | 53481033 | 1.1012 | 1.01.E-02 | 0.8592 | -0.2190 | Triglycerides        | Down |
| 69 | PC(20:0/20:2(11Z,14Z))                        | PC(40:2)               |            | HMDB0008276 | 24779046 | 1.4044 | 1.03.E-02 | 0.5200 | -0.9434 | Phosphatidylcholines | Down |
| 70 | PC(20:4(5Z,8Z,11Z,14Z)/24:1(15Z))             | PC(44:5)               |            |             |          | 1.5470 | 1.06.E-02 | 0.4422 | -1.1771 | Phosphatidylcholines | Down |
| 71 | O-tridecanoylcarnitine                        | O-tridecanoylcarnitine |            |             |          | 1.0703 | 1.88.E-02 | 0.3375 | -1.5672 | Acylcarnitines       | Down |
| 72 | PC(o-22:0/20:4(8Z,11Z,14Z,17Z))               | PC-O(42:4)             |            |             |          | 1.4274 | 1.90.E-02 | 0.6462 | -0.6301 | Phosphatidylcholines | Down |
| 73 | TG(16:0/16:1(9Z)/20:5(5Z,8Z,11Z,14Z,17Z))     | TG(52:5)               |            |             | 9544180  | 1.0188 | 2.72.E-02 | 0.7385 | -0.4373 | Triglycerides        | Down |
| 74 | PC(15:0/20:0)                                 | PC(35:0)               |            | HMDB0007944 | 52922322 | 1.0112 | 2.99.E-02 | 1.3061 | 0.3853  | Phosphatidylcholines | Up   |
| 75 | SM(d18:1/26:1(17Z))                           | SM(44:1)               |            | HMDB0013461 | 44260128 | 1.6295 | 3.02.E-02 | 0.7235 | -0.4669 | Sphingomyelins       | Down |
| 76 | PC(18:0/15:0)                                 | PC(33:0)               |            | HMDB0008033 | 52922645 | 1.0399 | 3.21.E-02 | 0.8481 | -0.2378 | Phosphatidylcholines | Down |
| 77 | TG(15:0/16:0/22:4(7Z,10Z,13Z,16Z))            | TG(53:4)               |            |             | 56938814 | 1.1953 | 3.22.E-02 | 0.9190 | -0.1218 | Triglycerides        | Down |
| 78 | sphingomyelin 33:2                            | SM(33:2)               |            |             | 52931135 | 1.1819 | 3.22.E-02 | 0.3330 | -1.5864 | Sphingomyelins       | Down |
| 79 | PC(22:1(13Z)/24:1(15Z))                       | PC(46:2)               |            |             |          | 1.0069 | 3.45.E-02 | 0.8088 | -0.3061 | Phosphatidylcholines | Down |

**Table S3.** Multivariate logistic regression analysis of the relationship between HC and RCC metabolites and dietary fats

| Category             | Logistic Regression     | Case | Control | Log of OR (95%CI)           | p        | Adjusted p |
|----------------------|-------------------------|------|---------|-----------------------------|----------|------------|
| Decanoylcarnitine    | Continuous scale        | 60   | 167     | -0.6299 (-0.8121 ~ -0.4477) | 1.22e-11 | 8.57e-11   |
|                      | Half2(>0.59)            | 4    | 83      | -1.2329 (-1.7179 ~ -0.7480) | 6.26e-07 | 4.38e-06   |
|                      | Half1(≤0.59)            | 56   | 84      | ref                         |          |            |
| LysoPC(18:2(9Z,12Z)) | Continuous scale        | 60   | 167     | -0.6905 (-0.9087 ~ -0.4724) | 5.51e-10 | 3.85e-09   |
|                      | Half2(>0.33)            | 3    | 82      | -1.2746 (-1.8146 ~ -0.7346) | 3.72e-06 | 2.61e-05   |
|                      | Half1(≤0.33)            | 57   | 85      | ref                         |          |            |
| LysoPC(16:0)         | Continuous scale        | 60   | 167     | -0.7459 (-0.9763 ~ -0.5156) | 2.20e-10 | 1.54e-09   |
|                      | Half2(>0.41)            | 2    | 82      | -1.3905 (-2.0257 ~ -0.7553) | 1.78e-05 | 0.0001     |
|                      | Half1(≤0.41)            | 58   | 85      | ref                         |          |            |
| L-Glutamic acid      | Continuous scale        | 60   | 167     | 0.7111 (0.4783 ~ 0.9439)    | 2.13e-09 | 1.49e-08   |
|                      | Half2(>-0.20)           | 53   | 83      | 1.0011 (0.5966 ~ 1.4057)    | 1.23e-06 | 8.62e-06   |
|                      | Half1(≤-0.20)           | 7    | 84      | ref                         |          |            |
| L-Tryptophan         | Continuous scale        | 60   | 167     | -0.8201 (-1.0728 ~ -0.5675) | 1.99e-10 | 1.39e-09   |
|                      | Half2(>0.33)            | 4    | 82      | -1.1069 (-1.5814 ~ -0.6325) | 4.82e-06 | 3.37e-05   |
|                      | Half1(≤0.33)            | 56   | 85      | ref                         |          |            |
| LysoPC(18:0)         | Continuous scale        | 60   | 167     | -0.6945 (-0.9112 ~ -0.4778) | 3.36e-10 | 2.35e-09   |
|                      | Half2(>0.43)            | 4    | 82      | -1.0470 (-1.5171 ~ -0.5768) | 1.28e-05 | 8.93e-05   |
|                      | Half1(≤0.43)            | 56   | 85      | ref                         |          |            |
| LysoPC(18:1(9Z))     | Continuous scale        | 60   | 167     | -0.6491 (-0.8626 ~ -0.4356) | 2.53e-09 | 1.77e-08   |
|                      | Half2(>0.30)            | 6    | 83      | -0.9085 (-1.3135 ~ -0.5035) | 1.10e-05 | 7.70e-05   |
|                      | Half1(≤0.30)            | 54   | 84      | ref                         |          |            |
| PC(15:1/22:2)        | Continuous scale        | 60   | 167     | 0.2141 (0.0387 ~ 0.3895)    | 0.0167   | 0.0586     |
|                      | Tertile3(>0.55)         | 14   | 54      | 0.4853 (-0.0159 ~ 0.9866)   | 0.0577   | 0.1155     |
|                      | Tertile2(-0.32~0.55)    | 41   | 57      | 1.0304 (0.5538 ~ 1.5069)    | 2.26e-05 | 0.0002     |
|                      | Tertile1(<-0.32)        | 5    | 56      | ref                         |          |            |
| PC(21:0/22:2)        | Continuous scale        | 60   | 167     | 0.2432 (0.1191 ~ 0.3674)    | 0.0001   | 0.0009     |
|                      | Half2(>-0.41)           | 19   | 17      | 0.6169 (0.2736~0.9602)      | 0.0004   | 0.0030     |
|                      | Half1(≤-0.41)           | 41   | 150     | ref                         |          |            |
| Energy(%EER)         | Continuous scale        | 27   | 223     | -0.0033 (-0.0076 ~ 0.0010)  | 0.1311   | 0.3059     |
|                      | Tertile3(>127.72)       | 10   | 75      | -0.2029 (-0.5995 ~ 0.1936)  | 0.3159   | 0.5054     |
|                      | Tertile2(94.67~127.72)  | 3    | 74      | -0.6372 (-1.2050 ~ -0.0695) | 0.0278   | 0.2226     |
|                      | Tertile1(<94.67)        | 14   | 74      | ref                         |          |            |
| Carbohydrate(%RNI)   | Continuous scale        | 27   | 223     | -0.0019 (-0.0038 ~ -0.0001) | 0.0437   | 0.153      |
|                      | Tertile3(>309.07)       | 6    | 75      | -0.4248 (-0.8824 ~ 0.0327)  | 0.0688   | 0.1834     |
|                      | Tertile2(230.72~309.07) | 7    | 74      | -0.2703 (-0.7047 ~ 0.1642)  | 0.2227   | 0.3564     |
|                      | Tertile1(<230.72)       | 14   | 74      | ref                         |          |            |
| PUFA(g/1000kcal)     | Continuous scale        | 27   | 223     | 0.0647 (0.0092 ~ 0.1202)    | 0.0223   | 0.156      |
|                      | Tertile3(>7.42)         | 11   | 75      | 0.3062 (-0.1869 ~ 0.7994)   | 0.2236   | 0.4472     |

|                                  |                       |    |     |                           |        |        |
|----------------------------------|-----------------------|----|-----|---------------------------|--------|--------|
| n-6 PUFA(g/1000kcal)             | Tertile2(5.37~7.42)   | 11 | 74  | 0.2112 (-0.2947 ~ 0.7171) | 0.4132 | 0.6611 |
|                                  | Tertile1(<5.37)       | 5  | 74  | ref                       |        |        |
|                                  | Continuous scale      | 27 | 223 | 0.7609 (0.2040 ~ 1.3177)  | 0.0074 | 0.0519 |
|                                  | Tertile3(>0.48)       | 15 | 75  | 0.4970 (0.0156 ~ 0.9784)  | 0.043  | 0.3442 |
|                                  | Tertile2(0.32~0.48)   | 7  | 74  | 0.1544 (-0.3811 ~ 0.6899) | 0.572  | 0.9152 |
| n-3 PUFA(g/1000kcal)             | Tertile1(<0.32)       | 5  | 74  | ref                       |        |        |
|                                  | Continuous scale      | 27 | 223 | 0.1554 (0.0615 ~ 0.2492)  | 0.0012 | 0.0082 |
|                                  | Tertile3(>2.41)       | 14 | 75  | 0.4327 (-0.0647 ~ 0.9300) | 0.0882 | 0.2351 |
|                                  | Tertile2(1.53~2.41)   | 8  | 74  | 0.1912 (-0.3465 ~ 0.7290) | 0.4858 | 0.7773 |
|                                  | Tertile1(<1.53)       | 5  | 74  | ref                       |        |        |
| Fish & shellfish (kcal/1000kcal) | Continuous scale      | 27 | 223 | 0.0001 (-0.0081 ~ 0.0083) | 0.9849 | 0.9849 |
|                                  | Tertile3(>42.31)      | 8  | 75  | 0.2412 (-0.3079 ~ 0.7902) | 0.3893 | 0.6228 |
|                                  | Tertile2(25.24~42.31) | 15 | 74  | 0.5592 (0.0509 ~ 1.0675)  | 0.0311 | 0.2486 |
|                                  | Tertile1(<25.24)      | 4  | 74  | ref                       |        |        |

Adjusted for age, sex, BMI, smoking, and drinking. RNII; Recommended nutrient intake, PUFA; Polyunsaturated fatty acid

**Table S4.** Metrics based on 4 machine learning techniques.

|             | Random Forest | XGBoost       | GBM           | LGBM          |
|-------------|---------------|---------------|---------------|---------------|
| AUC score   | 0.9589±0.0105 | 0.9386±0.0199 | 0.8386±0.0405 | 0.9371±0.0243 |
| Accuracy    | 0.9029±0.0199 | 0.9000±0.0285 | 0.8412±0.0270 | 0.8559±0.0110 |
| Sensitivity | 0.9556±0.0416 | 0.8667±0.0567 | 0.8222±0.0737 | 0.9556±0.0416 |
| Specificity | 0.8720±0.0574 | 0.9320±0.0204 | 0.8560±0.0408 | 0.8520±0.0371 |
| Recall      | 0.7556±0.0667 | 0.8111±0.0831 | 0.7556±0.0831 | 0.5889±0.0567 |
| Precision   | 0.8602±0.0257 | 0.8118±0.0496 | 0.6789±0.0388 | 0.8218±0.0542 |
| F1 score    | 0.8034±0.0455 | 0.8097±0.0591 | 0.7141±0.0569 | 0.6827±0.0322 |

XGB, extreme gradient boosting; GBM, gradient-boosted machine; LGBM, light gradient-boosted machine.

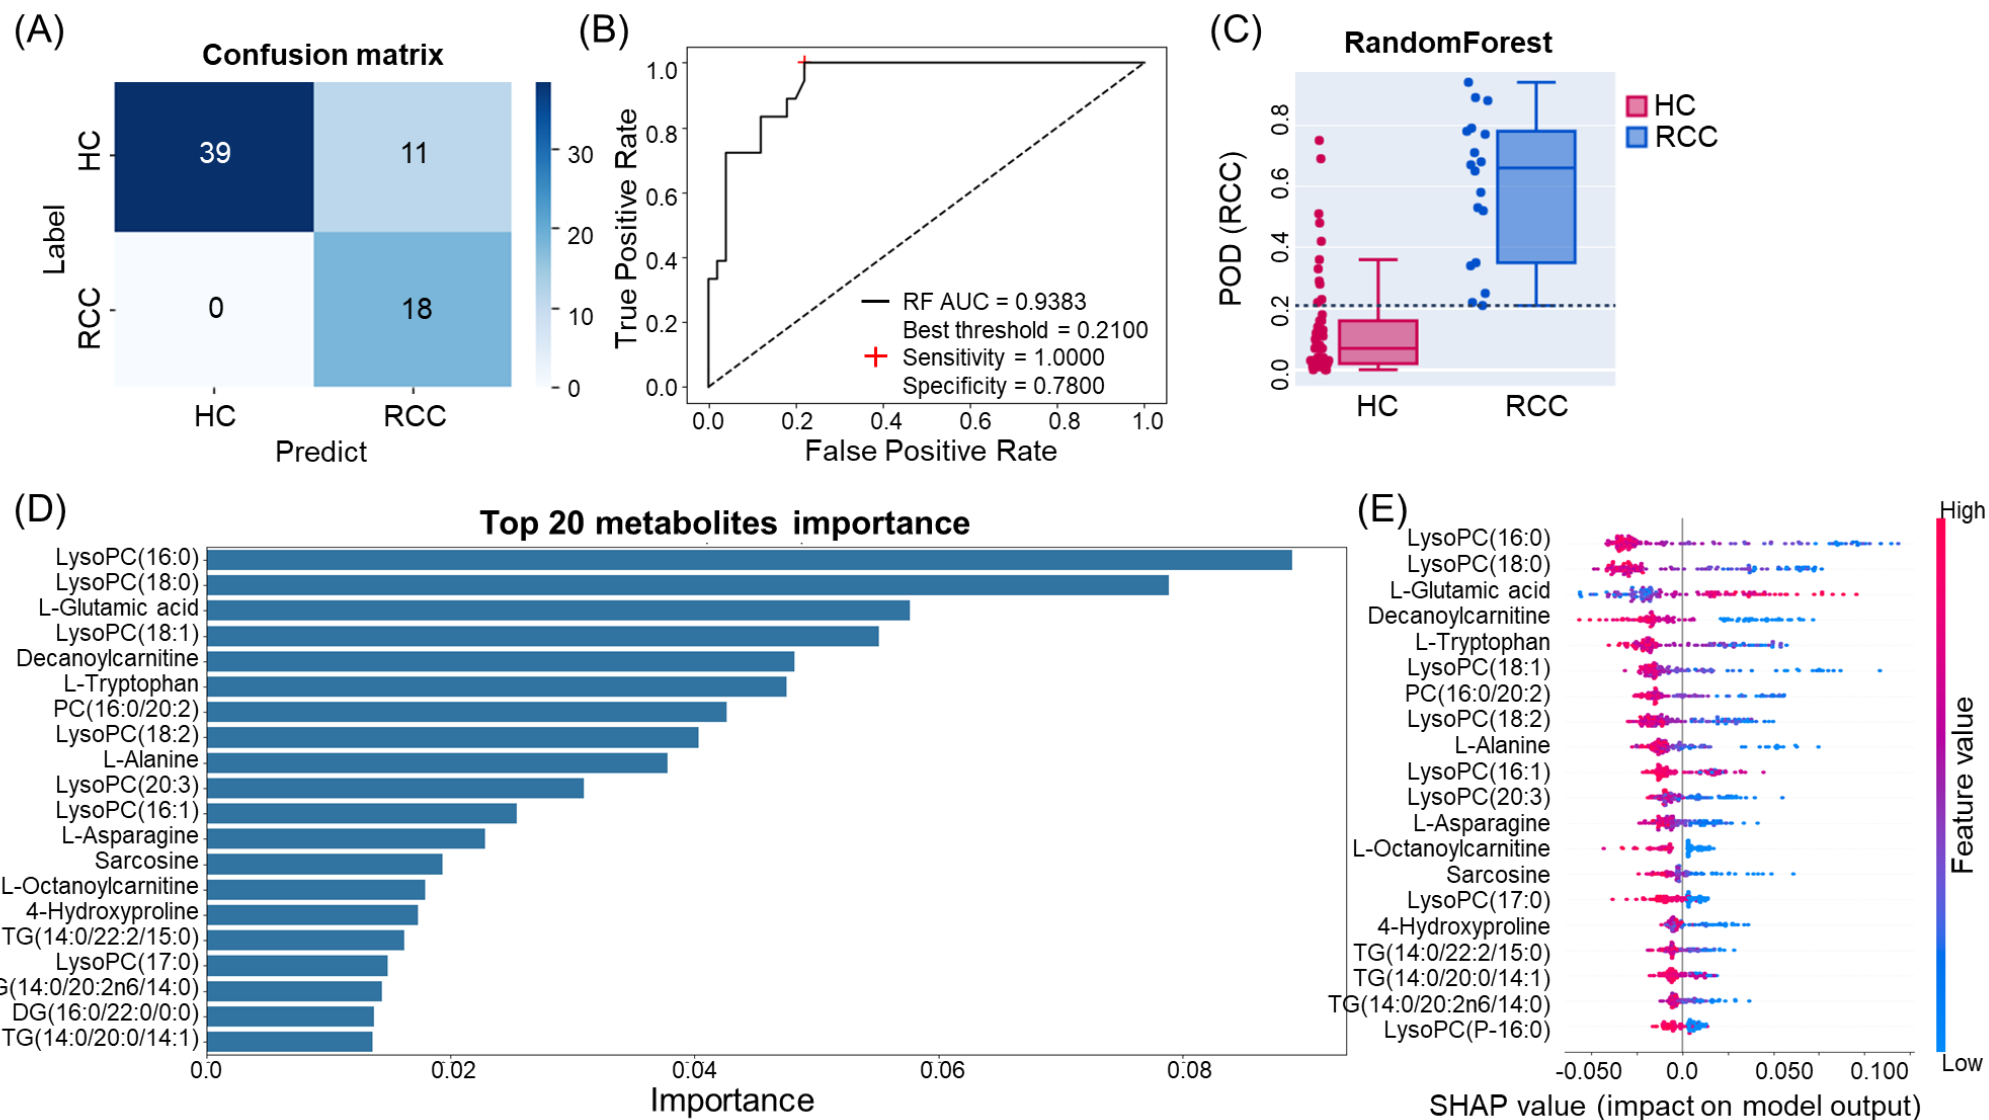



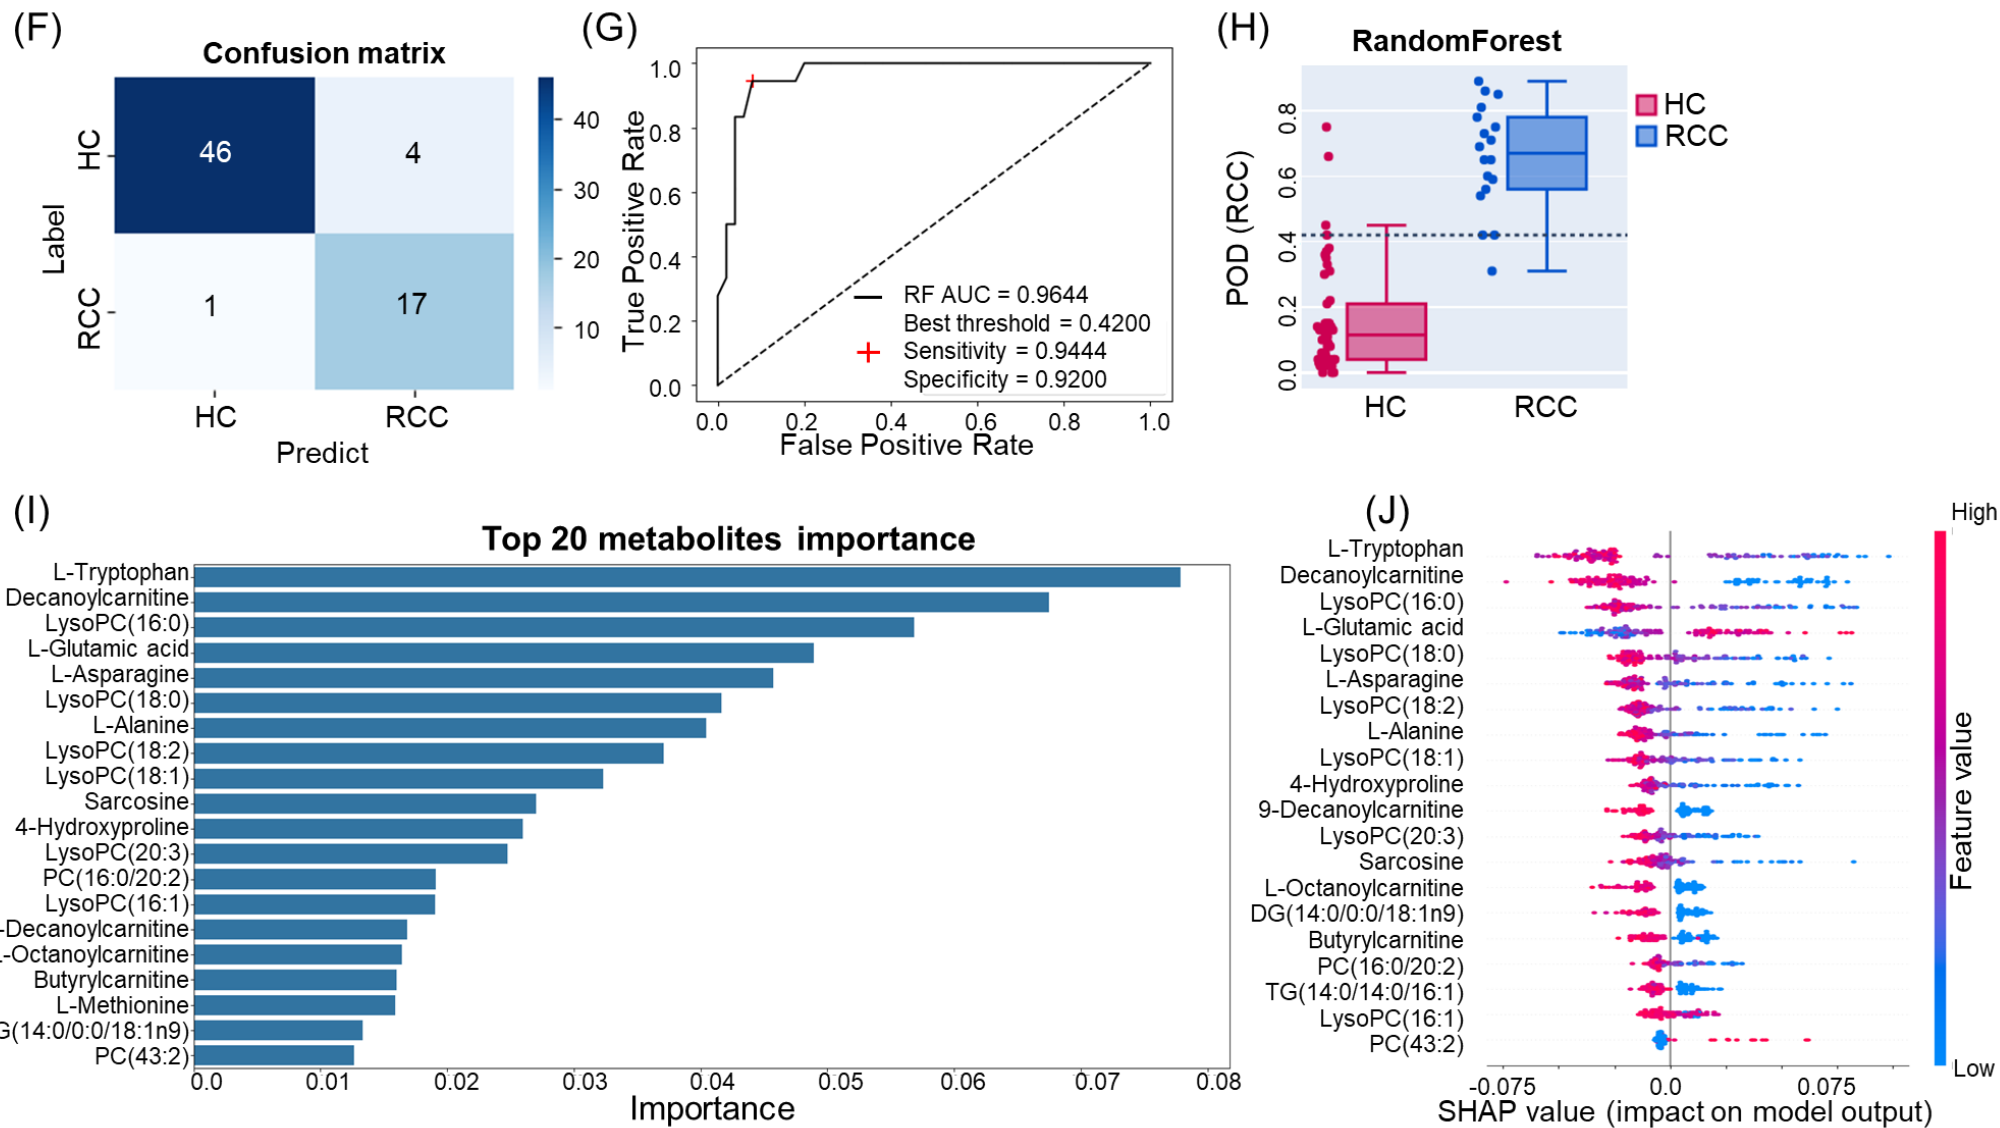

(K)

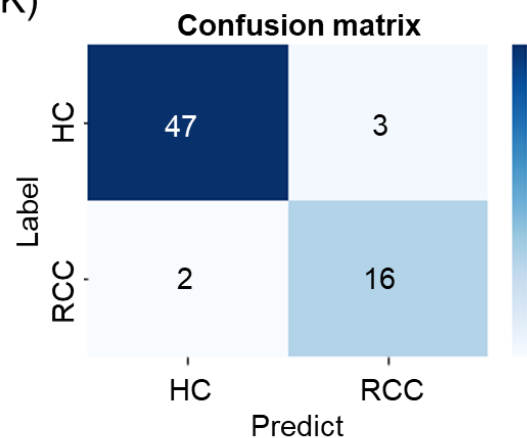

(L)

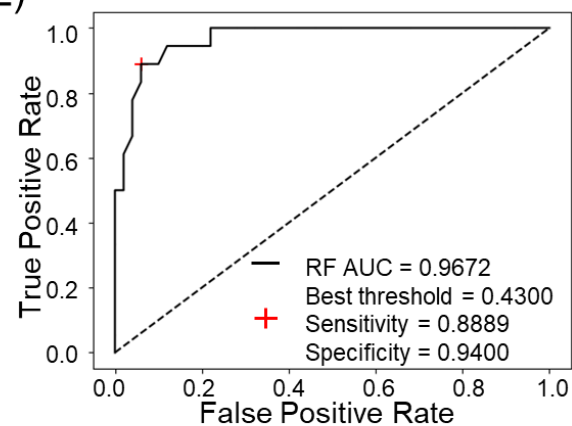

(M)

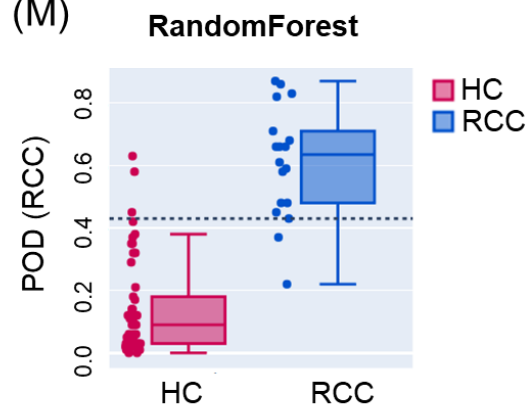

(N)

### Top 20 metabolites importance

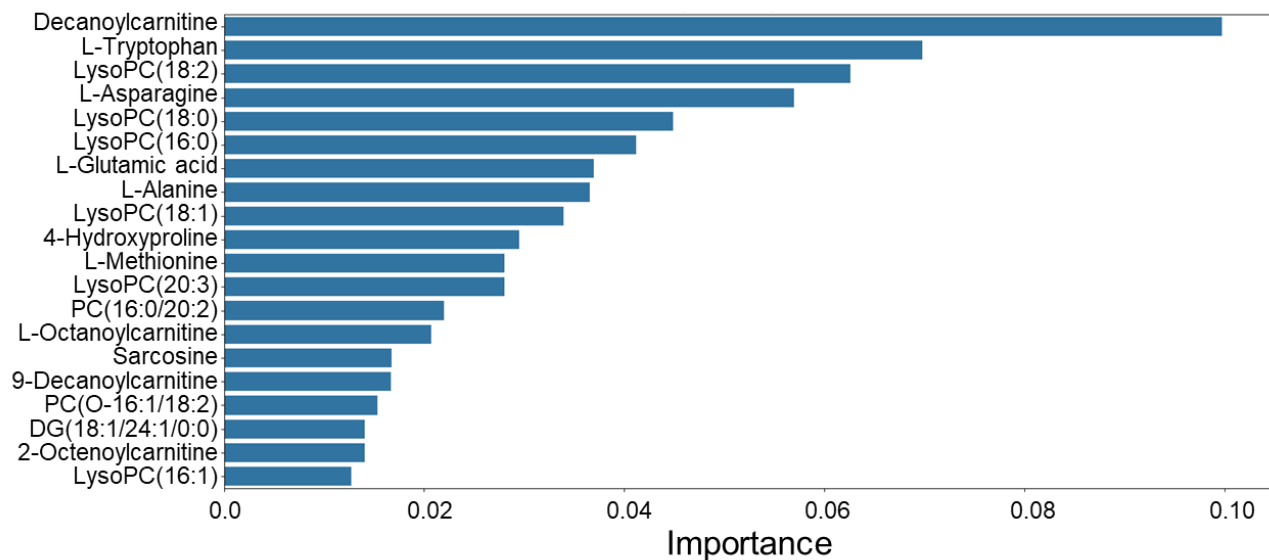

(O)

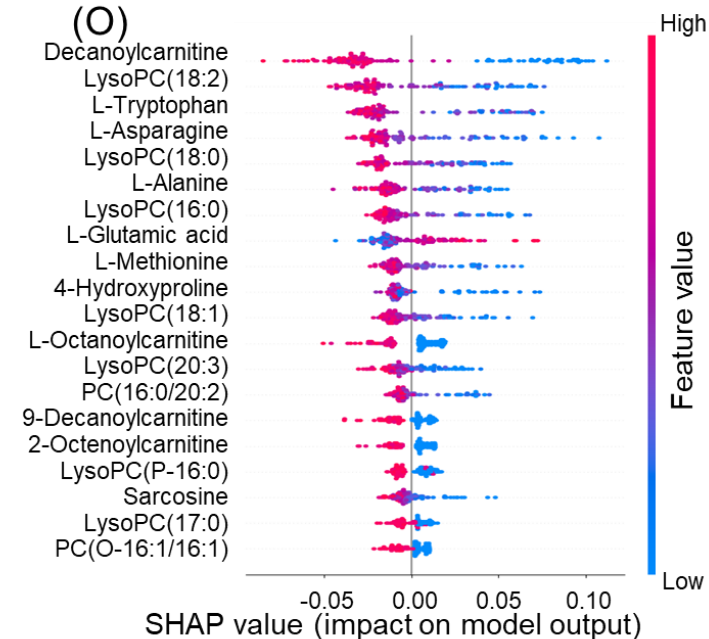

(P)

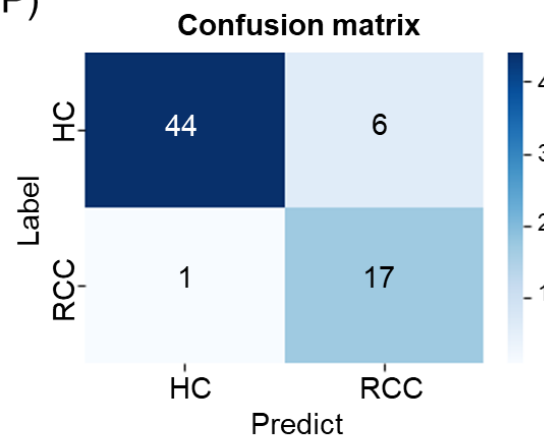

(Q)

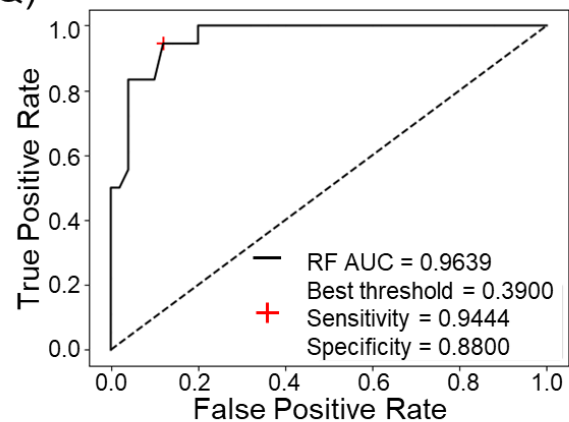

(R)

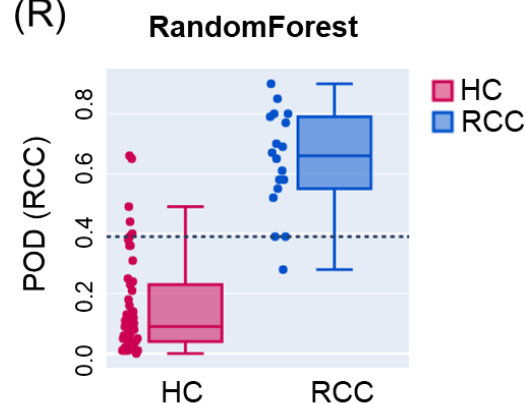

(S)

### Top 20 metabolites importance

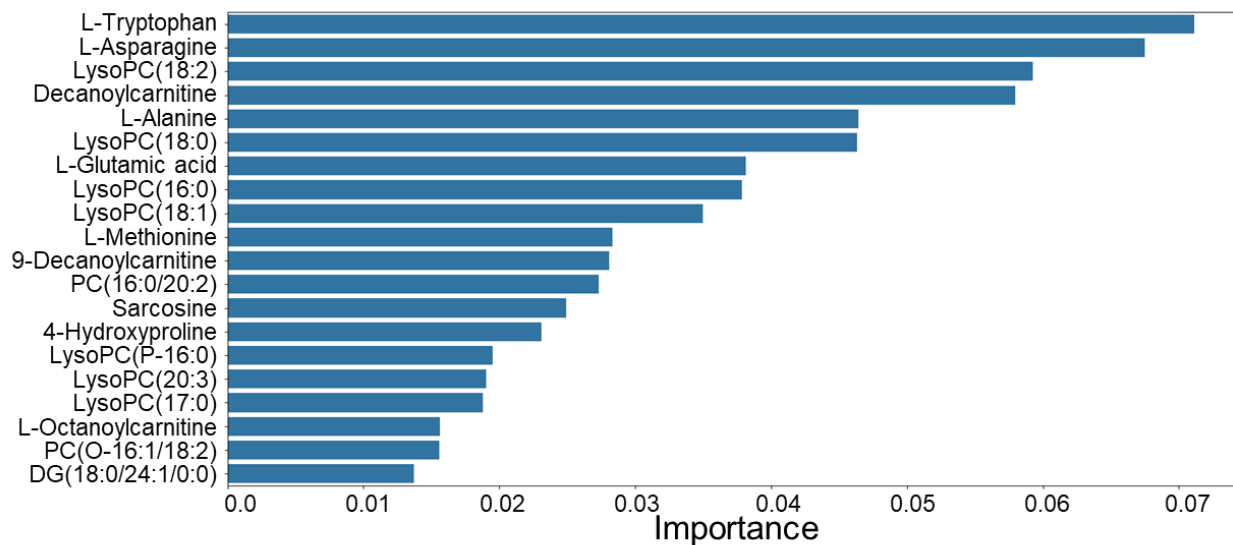

(T)

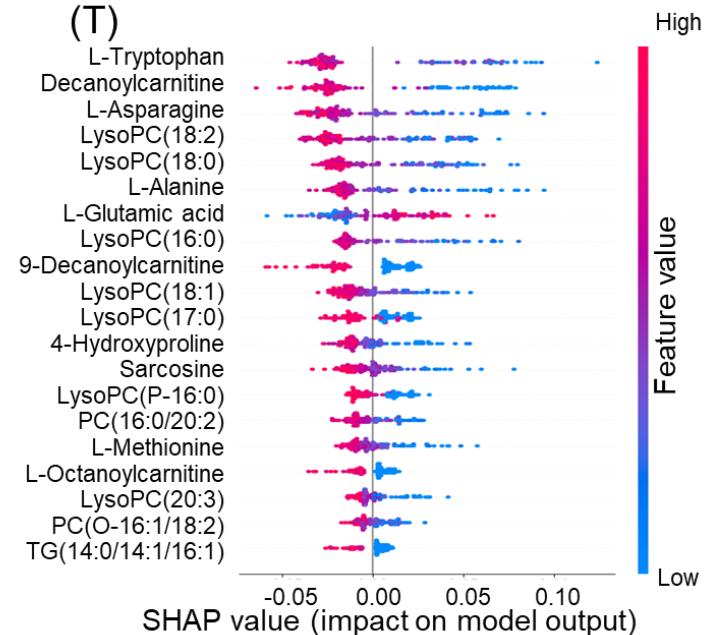

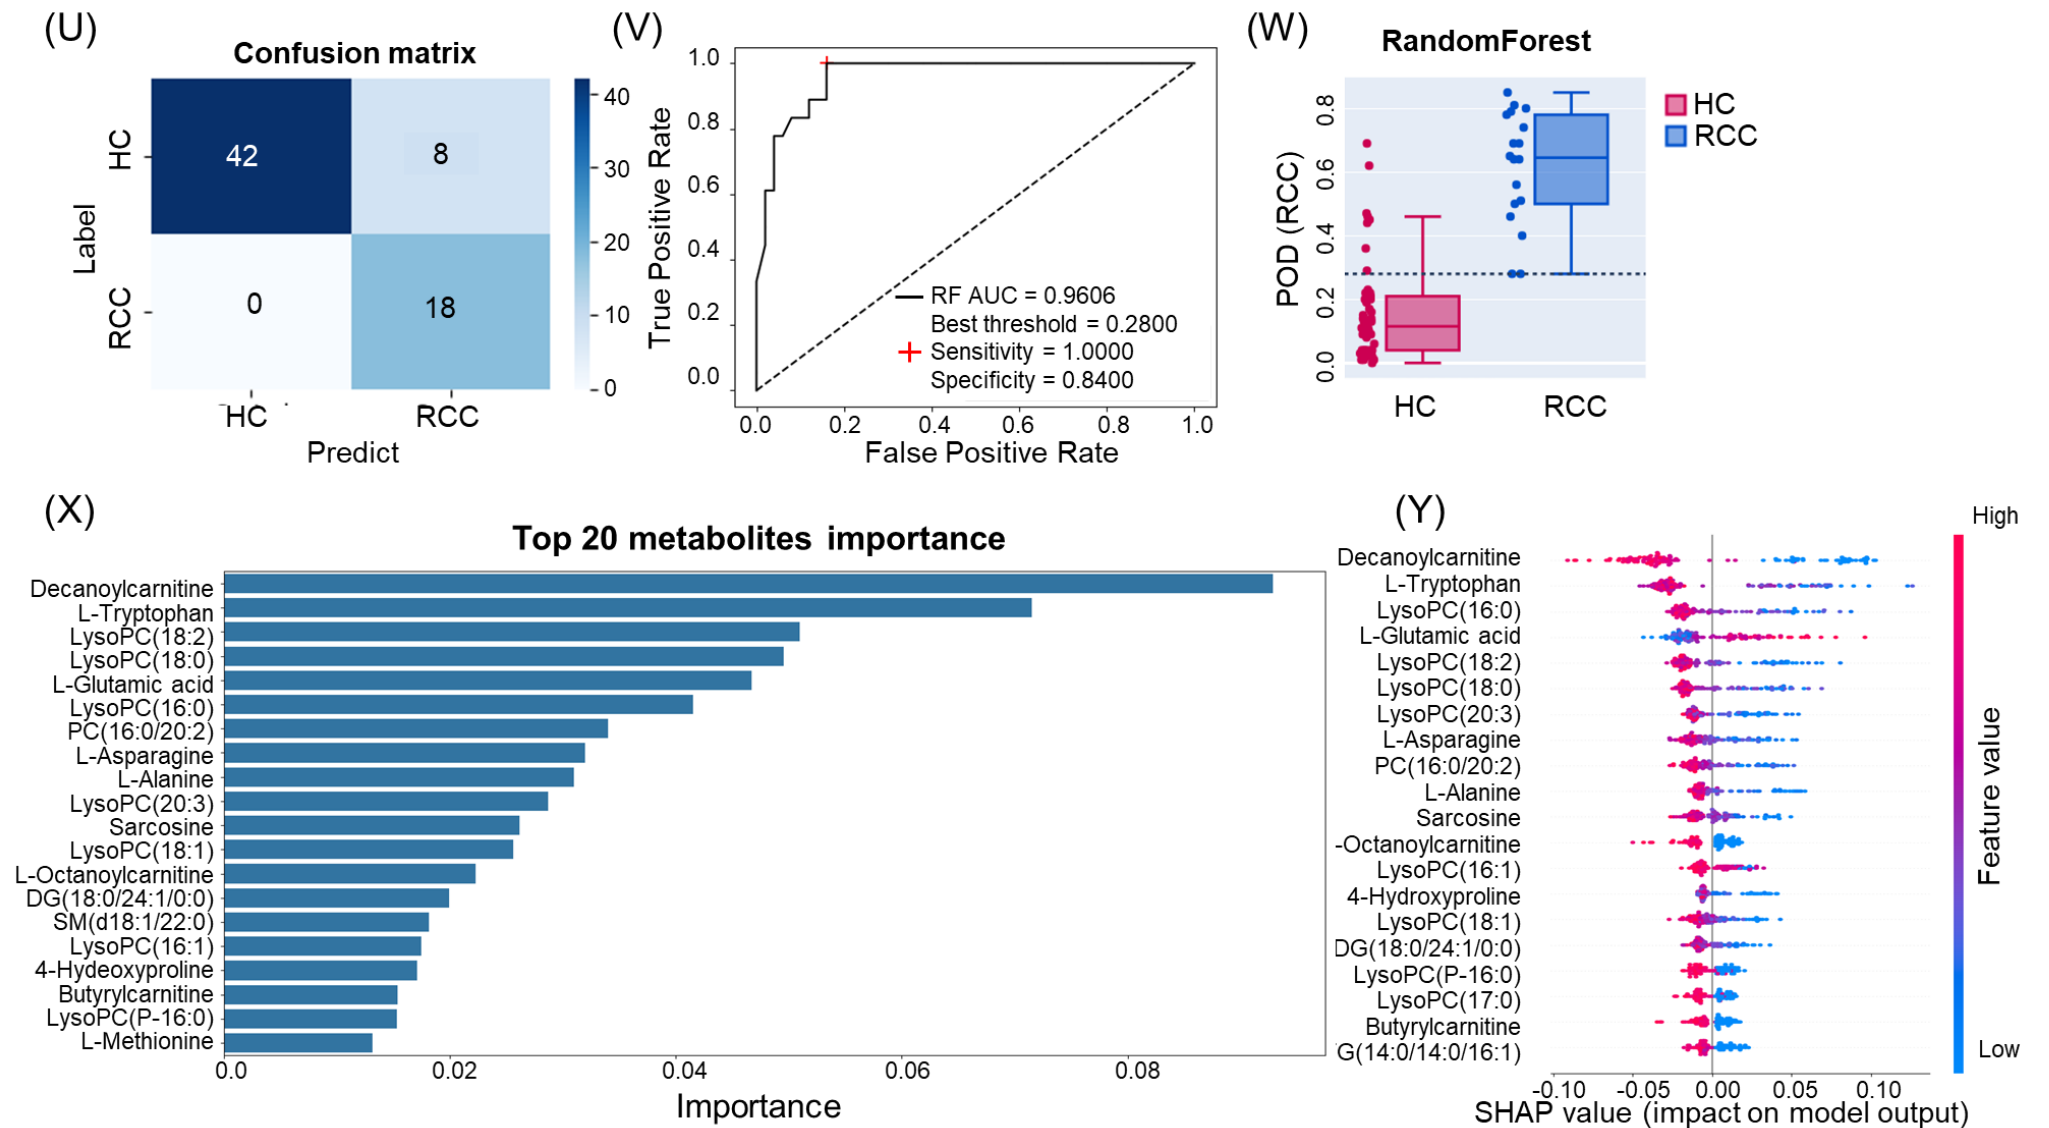

**Figure S2.** Results of random forest model via machine learning

(A, F, K, P, U) confusion matrix, (B, G, L, Q, V) ROC curve, (C, H, M, R, W) POD plot for each of the five folds, (D, I, N, S, X) Top 20 metabolites importance, (E, J, O, T, Y) SHAP plot.

**Table S5.** ROC curve analysis of identified potential metabolite markers in RCC

| Metabolites                                   | Discovery set |           | Validation set |           |
|-----------------------------------------------|---------------|-----------|----------------|-----------|
|                                               | AUC           | <i>p</i>  | AUC            | <i>p</i>  |
| L-Tryptophan                                  | 0.873         | 2.16.E-20 | 0.785          | 3.92.E-06 |
| LysoPC(16:0)                                  | 0.872         | 5.32.E-21 | 0.811          | 9.35.E-08 |
| LysoPC(18:0)                                  | 0.858         | 5.00.E-19 | 0.784          | 1.67.E-06 |
| LysoPC(18:2(9Z,12Z))                          | 0.841         | 1.51.E-17 | 0.846          | 1.09.E-08 |
| Decanoylcarnitine                             | 0.823         | 2.47.E-18 | 0.869          | 5.20.E-12 |
| PC(16:0/20:2(11Z,14Z))                        | 0.823         | 3.98.E-16 |                |           |
| LysoPC(18:1(9Z))                              | 0.820         | 3.34.E-15 | 0.791          | 3.67.E-06 |
| L-Asparagine                                  | 0.809         | 1.10.E-14 |                |           |
| L-Glutamic acid                               | 0.803         | 6.05.E-13 | 0.893          | 4.02.E-11 |
| L-Alanine                                     | 0.799         | 1.01.E-13 |                |           |
| L-Methionine                                  | 0.781         | 8.45.E-12 |                |           |
| 4-Hydroxyproline                              | 0.776         | 2.99.E-09 |                |           |
| LysoPC(20:3(5Z,8Z,11Z))                       | 0.772         | 6.94.E-11 |                |           |
| LysoPC(P-16:0)                                | 0.762         | 2.16.E-09 |                |           |
| Sarcosine                                     | 0.756         | 1.16.E-07 |                |           |
| LysoPC(17:0)                                  | 0.744         | 1.17.E-08 |                |           |
| DG(18:0/24:1(15Z)/0:0)                        | 0.743         | 1.85.E-08 |                |           |
| 9-Decenoylcarnitine                           | 0.737         | 9.25.E-12 |                |           |
| PC(o-16:1(9Z)/18:2(9Z,12Z))                   | 0.733         | 1.61.E-07 |                |           |
| LysoPC(16:1(9Z))                              | 0.733         | 6.44.E-07 |                |           |
| PC(o-18:1(11Z)/18:2(9Z,12Z))                  | 0.732         | 7.65.E-08 |                |           |
| DG(14:0/0:0/18:1n9)                           | 0.725         | 1.04.E-09 |                |           |
| PC(O-16:0/18:2(9Z,12Z))                       | 0.723         | 4.43.E-07 |                |           |
| TG(15:0/18:2(9Z,12Z)/20:3n6)                  | 0.720         | 1.24.E-07 |                |           |
| TG(14:0/14:0/16:1(9Z))                        | 0.709         | 1.74.E-08 |                |           |
| sphingomyelin 43:1                            | 0.708         | 2.26.E-06 |                |           |
| DG(18:1(11Z)/24:1(15Z)/0:0)                   | 0.707         | 5.09.E-06 |                |           |
| L-Octanoylcarnitine                           | 0.707         | 8.26.E-09 |                |           |
| SM(d18:1/26:0)                                | 0.705         | 2.85.E-07 |                |           |
| TG(14:0/14:1(9Z)/16:1(9Z))                    | 0.702         | 4.34.E-09 |                |           |
| TG(14:0/20:2n6/14:0)                          | 0.698         | 3.05.E-06 |                |           |
| PC(o-16:1(9Z)/16:1(9Z))                       | 0.698         | 3.78.E-07 |                |           |
| 2-Octenoylcarnitine                           | 0.696         | 5.00.E-08 |                |           |
| TG(16:1(9Z)/14:0/16:1(9Z))                    | 0.688         | 3.36.E-06 |                |           |
| DG(16:0/0:0/18:3n6)                           | 0.687         | 1.51.E-07 |                |           |
| DG(18:1(11Z)/16:0/0:0)                        | 0.687         | 6.76.E-05 |                |           |
| Butyrylcarnitine                              | 0.686         | 4.61.E-07 |                |           |
| TG(16:0/22:6(4Z,7Z,10Z,13Z,16Z,19Z)/16:0)     | 0.682         | 6.05.E-05 |                |           |
| TG(14:0/20:0/14:1(9Z))                        | 0.680         | 4.27.E-03 |                |           |
| phosphatidylcholine O-37:6                    | 0.677         | 1.83.E-04 |                |           |
| TG(14:0/16:1(9Z)/20:3n6)                      | 0.675         | 3.25.E-03 |                |           |
| PC(22:1(13Z)/22:6(4Z,7Z,10Z,13Z,16Z,19Z))     | 0.671         | 9.09.E-05 |                |           |
| TG(16:1(9Z)/16:1(9Z)/20:3n6)                  | 0.669         | 9.13.E-05 |                |           |
| TG(15:0/15:0/20:3n6)                          | 0.666         | 1.80.E-04 |                |           |
| TG(14:0/22:2(13Z,16Z)/15:0)                   | 0.658         | 1.25.E-03 |                |           |
| TG(16:0/16:1(9Z)/20:5(5Z,8Z,11Z,14Z,17Z))     | 0.648         | 1.55.E-02 |                |           |
| TG(14:0/20:1(11Z)/15:0)                       | 0.648         | 2.77.E-04 |                |           |
| TG(16:0/16:1(9Z)/18:1(9Z))                    | 0.647         | 9.91.E-04 |                |           |
| TG(14:0/22:4(7Z,10Z,13Z,16Z)/15:0)            | 0.646         | 1.91.E-03 |                |           |
| Ceramide (d18:1/22:0)                         | 0.645         | 4.21.E-05 |                |           |
| DG(16:1n7/0:0/16:1n7)                         | 0.644         | 4.80.E-06 |                |           |
| TG(15:0/18:3(6Z,9Z,12Z)/15:0)                 | 0.642         | 5.64.E-05 |                |           |
| TG(14:0/22:0/14:1(9Z))                        | 0.639         | 1.43.E-03 |                |           |
| TG(15:0/18:1(9Z)/22:6(4Z,7Z,10Z,13Z,16Z,19Z)) | 0.633         | 5.57.E-04 |                |           |
| DG(16:0/20:4(5Z,8Z,11Z,14Z)/0:0)              | 0.633         | 1.33.E-03 |                |           |
| TG(15:0/18:1(9Z)/16:1(9Z))                    | 0.630         | 1.23.E-03 |                |           |
| SM(d18:1/22:0)                                | 0.629         | 1.01.E-04 |                |           |

|                                            |       |           |  |  |
|--------------------------------------------|-------|-----------|--|--|
| TG(15:0/16:0/20:3n6)                       | 0.628 | 5.13.E-03 |  |  |
| Cer(d18:1/24:1(15Z))                       | 0.626 | 1.72.E-04 |  |  |
| Methionine sulfoxide                       | 0.626 | 6.49.E-04 |  |  |
| PC(14:0/18:3(9Z,12Z,15Z))                  | 0.625 | 1.44.E-03 |  |  |
| DG(16:0/22:0/0:0)                          | 0.625 | 1.22.E-03 |  |  |
| TG(15:0/22:2(13Z,16Z)/18:4(6Z,9Z,12Z,15Z)) | 0.624 | 1.15.E-03 |  |  |
| L-Aspartic acid                            | 0.619 | 1.22.E-03 |  |  |
| PC(20:0/20:2(11Z,14Z))                     | 0.618 | 5.29.E-03 |  |  |
| phosphatidylcholine 43:2                   | 0.618 | 1.15.E-05 |  |  |
| PC(18:0/15:0)                              | 0.617 | 1.91.E-02 |  |  |
| PC(15:0/20:0)                              | 0.617 | 1.73.E-02 |  |  |
| PC(22:1(13Z)/24:1(15Z))                    | 0.614 | 2.10.E-02 |  |  |
| PC(20:4(5Z,8Z,11Z,14Z)/24:1(15Z))          | 0.603 | 5.49.E-03 |  |  |
| TG(14:0/22:5(4Z,7Z,10Z,13Z,16Z)/15:0)      | 0.603 | 3.41.E-03 |  |  |
| phosphatidylcholine O-32:3                 | 0.599 | 4.18.E-03 |  |  |
| TG(15:0/16:1(9Z)/22:5(4Z,7Z,10Z,13Z,16Z))  | 0.597 | 4.91.E-03 |  |  |
| SM(d18:1/26:1(17Z))                        | 0.595 | 1.76.E-02 |  |  |
| Linoelaidyl carnitine                      | 0.595 | 1.41.E-03 |  |  |
| PC(o-22:0/20:4(8Z,11Z,14Z,17Z))            | 0.590 | 1.03.E-02 |  |  |
| sphingomyelin 33:2                         | 0.585 | 1.93.E-02 |  |  |
| O-tridecanoylcarnitine                     | 0.577 | 1.01.E-02 |  |  |
| TG(15:0/16:0/22:4(7Z,10Z,13Z,16Z))         | 0.559 | 1.93.E-02 |  |  |

AUC, area under curve

**Table S6.** Multivariate logistic regression analysis of the relationship between metabolites of HC and T stage 1 RCC

| Category             | Logistic Regression    | Case | Control | Log of OR (95%CI)      | p                      | Gg                     |
|----------------------|------------------------|------|---------|------------------------|------------------------|------------------------|
| LysoPC (16:0)        | Continuous scale       | 68   | 223     | -0.04 (-0.05 ~ -0.03)  | $1.90 \times 10^{-12}$ | $1.33 \times 10^{-11}$ |
|                      | Tertile3(>104.00)      | 2    | 75      | -1.46 (-2.10 ~ -0.82)  | $8.14 \times 10^{-06}$ | $3.25 \times 10^{-05}$ |
|                      | Tertile2(88.10-104.00) | 5    | 73      | -1.04 (-1.47 ~ -0.62)  | $1.67 \times 10^{-06}$ | $1.33 \times 10^{-05}$ |
|                      | Tertile1(<88.10)       | 61   | 75      | ref                    |                        |                        |
| L-Tryptophan         | Continuous scale       | 68   | 223     | -0.06 (-0.08 ~ -0.04)  | $3.67 \times 10^{-12}$ | $2.57 \times 10^{-11}$ |
|                      | Tertile3(>73.00)       | 3    | 75      | -1.41 (-1.97 ~ -0.85)  | $7.00 \times 10^{-07}$ | $5.60 \times 10^{-06}$ |
|                      | Tertile2(63.10-73.00)  | 5    | 73      | -1.09 (-1.53 ~ -0.66)  | $8.73 \times 10^{-07}$ | $3.49 \times 10^{-06}$ |
|                      | Tertile1(<63.10)       | 60   | 75      | ref                    |                        |                        |
| L-Glutamic acid      | Continuous scale       | 68   | 223     | 0.02 (0.02 ~ 0.03)     | $9.48 \times 10^{-12}$ | $6.64 \times 10^{-11}$ |
|                      | Tertile3(>61.80)       | 62   | 75      | 1.72 (1.04 ~ 2.40)     | $6.66 \times 10^{-07}$ | $5.33 \times 10^{-06}$ |
|                      | Tertile2(44.60-61.80)  | 4    | 74      | 0.39 (-0.38 ~ 1.16)    | 0.3164                 | 0.5062                 |
|                      | Tertile1(<44.60)       | 2    | 74      | ref                    |                        |                        |
| LysoPC(18:2(9Z,12Z)) | Continuous scale       | 68   | 223     | -0.55 (-0.72 ~ -0.39)  | $2.15 \times 10^{-11}$ | $1.51 \times 10^{-10}$ |
|                      | Tertile3(>5.46)        | 1    | 75      | -1.81 (-2.70 ~ -0.92)  | $6.80 \times 10^{-05}$ | 0.0003                 |
|                      | Tertile2(4.19-5.46)    | 11   | 73      | -0.72 (-1.05 ~ -0.38)  | $2.66 \times 10^{-05}$ | 0.0002                 |
|                      | Tertile1(<4.19)        | 56   | 75      | ref                    |                        |                        |
| LysoPC(18:0)         | Continuous scale       | 68   | 223     | -0.15 (-0.19 ~ -0.10)  | $5.26 \times 10^{-11}$ | $3.68 \times 10^{-10}$ |
|                      | Tertile3(>20.80)       | 2    | 74      | -1.38 (-2.01 ~ -0.74)  | $2.14 \times 10^{-05}$ | $8.54 \times 10^{-05}$ |
|                      | Tertile2(16.80-20.80)  | 9    | 74      | -0.81 (-1.15 ~ -0.46)  | $4.87 \times 10^{-06}$ | $3.90 \times 10^{-05}$ |
|                      | Tertile1(<16.80)       | 57   | 75      | ref                    |                        |                        |
| LysoPC(18:1(9Z))     | Continuous scale       | 68   | 223     | -0.38 (-0.50 ~ -0.27)  | $1.38 \times 10^{-10}$ | $9.67 \times 10^{-10}$ |
|                      | Tertile3(>7.90)        | 1    | 75      | -1.66 (-2.53 ~ -0.78)  | 0.0002                 | 0.0018                 |
|                      | Tertile2(6.37-7.90)    | 17   | 74      | -0.44 (-0.72 ~ -0.15)  | 0.0026                 | 0.0105                 |
|                      | Tertile1(<6.37)        | 50   | 74      | ref                    |                        |                        |
| Decanoylcarnitine    | Continuous scale       | 68   | 223     | -5.89 (-11.72 ~ -0.06) | 0.0476                 | 0.3332                 |
|                      | Tertile3(>0.37)        | 1    | 58      | -0.91 (-1.84 ~ 0.02)   | 0.0554                 | 0.2214                 |
|                      | Tertile2(0.28-0.37)    | 1    | 59      | -0.98 (-1.91 ~ -0.04)  | 0.0413                 | 0.3303                 |
|                      | Tertile1(<0.28)        | 8    | 59      | ref                    |                        |                        |

Adjusted for age, sex, BMI, smoking, drinking.

**Table S7.** Results of pathway analysis between HC and RCC

| Pathway Name                                        | Match Status | <i>p</i>               | $-\log(p)$ | Holm <i>p</i>          | FDR                   | Impact | Matched metabolites                                                                                                                                                                                                                                                                                                                                                                                                                                                                                                                                           |
|-----------------------------------------------------|--------------|------------------------|------------|------------------------|-----------------------|--------|---------------------------------------------------------------------------------------------------------------------------------------------------------------------------------------------------------------------------------------------------------------------------------------------------------------------------------------------------------------------------------------------------------------------------------------------------------------------------------------------------------------------------------------------------------------|
| Alanine, aspartate and glutamate metabolism         | 5/28         | $1.08 \times 10^{-42}$ | 41.97      | $3.80 \times 10^{-41}$ | $3.8 \times 10^{-41}$ | 0.5345 | L-Aspartic acid; L-Asparagine; L-Alanine; L-Glutamic acid; L-Glutamine                                                                                                                                                                                                                                                                                                                                                                                                                                                                                        |
| Arginine and proline metabolism                     | 3/38         | $7.88 \times 10^{-39}$ | 38.10      | $2.68 \times 10^{-37}$ | $1.4 \times 10^{-37}$ | 0.2576 | 4-Hydroxyproline; L-Glutamic acid; L-Ornithine                                                                                                                                                                                                                                                                                                                                                                                                                                                                                                                |
| Arginine biosynthesis                               | 4/14         | $3.96 \times 10^{-38}$ | 37.40      | $1.31 \times 10^{-36}$ | $4.6 \times 10^{-37}$ | 0.1777 | L-Glutamic acid; L-Aspartic acid; L-Ornithine; L-Glutamine                                                                                                                                                                                                                                                                                                                                                                                                                                                                                                    |
| Histidine metabolism                                | 3/16         | $4.18 \times 10^{-36}$ | 35.38      | $1.34 \times 10^{-34}$ | $3.7 \times 10^{-35}$ | 0.2213 | L-Glutamic acid; L-Histidine; L-Aspartic acid                                                                                                                                                                                                                                                                                                                                                                                                                                                                                                                 |
| Glycerophospholipid metabolism                      | 2/36         | $4.16 \times 10^{-30}$ | 29.38      | $1.29 \times 10^{-28}$ | $2.9 \times 10^{-29}$ | 0.1118 | Phosphatidylcholine(PC(14:0/16:0), PC(16:0/16:0), PC(14:0/18:2), PC(16:0/18:1), PC(16:0/18:2), PC(16:0/18:3), PC(14:0/20:4), PC(15:0/20:3), PC(15:0/20:4), PC(16:0/20:2), PC(16:0/20:3), PC(16:0/20:4), PC(16:0/20:5), PC(14:0/22:6), PC(15:0/22:4), PC(15:0/22:5), PC(15:0/22:6), PC(16:0/22:4), PC(16:0/22:5), PC(16:0/22:6), PC(18:0/22:6), PC(18:4/22:5), PC(20:1/22:6), PC(20:4/22:6)); 1-Acyl-sn-glycero-3-phosphocholine(LysoPC(16:0), LysoPC(16:1), LysoPC(17:0), LysoPC(18:0), LysoPC(18:1), LysoPC(18:2), LysoPC(20:3), LysoPC(20:4), LysoPC(22:6)) |
| Glutathione metabolism                              | 2/28         | $2.50 \times 10^{-29}$ | 28.60      | $7.49 \times 10^{-28}$ | $1.5 \times 10^{-28}$ | 0.0197 | L-Glutamic acid; L-Ornithine                                                                                                                                                                                                                                                                                                                                                                                                                                                                                                                                  |
| Aminoacyl-tRNA biosynthesis                         | 12/48        | $3.67 \times 10^{-26}$ | 25.44      | $1.06 \times 10^{-24}$ | $1.8 \times 10^{-25}$ | 0.0000 | L-Asparagine; L-Histidine; L-Phenylalanine; L-Glutamine; L-Aspartic acid; L-Methionine; L-Alanine; L-Lysine; L-Threonine; L-Tryptophan; L-Tyrosine; L-Glutamic acid                                                                                                                                                                                                                                                                                                                                                                                           |
| D-Glutamine and D-glutamate metabolism              | 2/6          | $3.93 \times 10^{-25}$ | 24.41      | $1.10 \times 10^{-23}$ | $1.4 \times 10^{-24}$ | 0.5000 | L-Glutamic acid; L-Glutamine                                                                                                                                                                                                                                                                                                                                                                                                                                                                                                                                  |
| Glyoxylate and dicarboxylate metabolism             | 2/32         | $3.93 \times 10^{-25}$ | 24.41      | $1.10 \times 10^{-23}$ | $1.4 \times 10^{-24}$ | 0.0000 | L-Glutamic acid; L-Glutamine                                                                                                                                                                                                                                                                                                                                                                                                                                                                                                                                  |
| Nitrogen metabolism                                 | 2/6          | $3.93 \times 10^{-25}$ | 24.41      | $1.10 \times 10^{-23}$ | $1.4 \times 10^{-24}$ | 0.0000 | L-Glutamic acid; L-Glutamine                                                                                                                                                                                                                                                                                                                                                                                                                                                                                                                                  |
| Tryptophan metabolism                               | 1/41         | $6.32 \times 10^{-25}$ | 24.20      | $1.58 \times 10^{-23}$ | $2.0 \times 10^{-24}$ | 0.1431 | L-Tryptophan                                                                                                                                                                                                                                                                                                                                                                                                                                                                                                                                                  |
| Butanoate metabolism                                | 1/15         | $5.94 \times 10^{-22}$ | 21.23      | $1.43 \times 10^{-20}$ | $1.6 \times 10^{-21}$ | 0.0000 | L-Glutamic acid                                                                                                                                                                                                                                                                                                                                                                                                                                                                                                                                               |
| Porphyrin and chlorophyll metabolism                | 1/30         | $5.94 \times 10^{-22}$ | 21.23      | $1.43 \times 10^{-20}$ | $1.6 \times 10^{-21}$ | 0.0000 | L-Glutamic acid                                                                                                                                                                                                                                                                                                                                                                                                                                                                                                                                               |
| beta-Alanine metabolism                             | 2/21         | $3.76 \times 10^{-16}$ | 15.43      | $8.27 \times 10^{-15}$ | $9.4 \times 10^{-16}$ | 0.0000 | L-Aspartic acid; L-Histidine                                                                                                                                                                                                                                                                                                                                                                                                                                                                                                                                  |
| Selenocompound metabolism                           | 1/20         | $8.55 \times 10^{-16}$ | 15.07      | $1.79 \times 10^{-14}$ | $2.0 \times 10^{-15}$ | 0.0000 | L-Alanine                                                                                                                                                                                                                                                                                                                                                                                                                                                                                                                                                     |
| Cysteine and methionine metabolism                  | 1/33         | $7.39 \times 10^{-15}$ | 14.13      | $1.48 \times 10^{-13}$ | $1.6 \times 10^{-14}$ | 0.1045 | L-Methionine                                                                                                                                                                                                                                                                                                                                                                                                                                                                                                                                                  |
| Glycine, serine and threonine metabolism            | 2/33         | $1.77 \times 10^{-14}$ | 13.75      | $3.35 \times 10^{-13}$ | $3.6 \times 10^{-14}$ | 0.0929 | Sarcosine; L-Threonine                                                                                                                                                                                                                                                                                                                                                                                                                                                                                                                                        |
| Lysine degradation                                  | 1/25         | $1.67 \times 10^{-13}$ | 12.78      | $3.01 \times 10^{-12}$ | $3.1 \times 10^{-13}$ | 0.0000 | L-Lysine                                                                                                                                                                                                                                                                                                                                                                                                                                                                                                                                                      |
| Biotin metabolism                                   | 1/10         | $1.67 \times 10^{-13}$ | 12.78      | $3.01 \times 10^{-12}$ | $3.1 \times 10^{-13}$ | 0.0000 | L-Lysine                                                                                                                                                                                                                                                                                                                                                                                                                                                                                                                                                      |
| Phenylalanine, tyrosine and tryptophan biosynthesis | 2/4          | $8.44 \times 10^{-12}$ | 11.07      | $1.35 \times 10^{-10}$ | $1.4 \times 10^{-11}$ | 1.0000 | L-Phenylalanine; L-Tyrosine                                                                                                                                                                                                                                                                                                                                                                                                                                                                                                                                   |
| Phenylalanine metabolism                            | 2/10         | $8.44 \times 10^{-12}$ | 11.07      | $1.35 \times 10^{-10}$ | $1.4 \times 10^{-11}$ | 0.3571 | L-Phenylalanine; L-Tyrosine                                                                                                                                                                                                                                                                                                                                                                                                                                                                                                                                   |
| Tyrosine metabolism                                 | 1/42         | $1.31 \times 10^{-11}$ | 10.88      | $1.83 \times 10^{-10}$ | $2.0 \times 10^{-11}$ | 0.1397 | L-Tyrosine                                                                                                                                                                                                                                                                                                                                                                                                                                                                                                                                                    |
| Ubiquinone and other terpenoid-quinone biosynthesis | 1/9          | $1.31 \times 10^{-11}$ | 10.88      | $1.83 \times 10^{-10}$ | $2.0 \times 10^{-11}$ | 0.0000 | L-Tyrosine                                                                                                                                                                                                                                                                                                                                                                                                                                                                                                                                                    |
| Arachidonic acid metabolism                         | 1/36         | $2.16 \times 10^{-09}$ | 8.666      | $2.59 \times 10^{-08}$ | $2.9 \times 10^{-09}$ | 0.0000 | Phosphatidylcholine                                                                                                                                                                                                                                                                                                                                                                                                                                                                                                                                           |



|                                             |      |                        |       |                        |                       |        |                                                                                                               |
|---------------------------------------------|------|------------------------|-------|------------------------|-----------------------|--------|---------------------------------------------------------------------------------------------------------------|
| Linoleic acid metabolism                    | 1/5  | $2.16 \times 10^{-09}$ | 8.666 | $2.59 \times 10^{-08}$ | $2.9 \times 10^{-09}$ | 0.0000 | Phosphatidylcholine                                                                                           |
| alpha-Linolenic acid metabolism             | 1/13 | $2.16 \times 10^{-09}$ | 8.666 | $2.59 \times 10^{-08}$ | $2.9 \times 10^{-09}$ | 0.0000 | Phosphatidylcholine                                                                                           |
| Valine, leucine and isoleucine biosynthesis | 1/8  | $7.59 \times 10^{-08}$ | 7.120 | $6.84 \times 10^{-07}$ | $9.8 \times 10^{-08}$ | 0.0000 | L-Threonine                                                                                                   |
| Sphingolipid metabolism                     | 1/21 | $8.98 \times 10^{-08}$ | 7.047 | $7.18 \times 10^{-07}$ | $1.1 \times 10^{-07}$ | 0.0000 | Sphingomyelin(SM(d18:1/16:0), SM(d18:1/18:0), SM(d18:1/20:0), SM(d18:0/20:2), SM(d18:1/22:0), SM(d18:1/24:1)) |
| Purine metabolism                           | 1/65 | $9.73 \times 10^{-07}$ | 6.012 | $6.81 \times 10^{-06}$ | $1.1 \times 10^{-06}$ | 0.0000 | L-Glutamine                                                                                                   |
| Pyrimidine metabolism                       | 1/39 | $9.73 \times 10^{-07}$ | 6.012 | $6.81 \times 10^{-06}$ | $1.1 \times 10^{-06}$ | 0.0000 | L-Glutamine                                                                                                   |
| Nicotinate and nicotinamide metabolism      | 1/15 | $7.90 \times 10^{-05}$ | 4.102 | 0.0004                 | $8.6 \times 10^{-05}$ | 0.0000 | L-Aspartic acid                                                                                               |
| Pantothenate and CoA biosynthesis           | 1/19 | $7.90 \times 10^{-05}$ | 4.102 | 0.0004                 | $8.6 \times 10^{-05}$ | 0.0000 | L-Aspartic acid                                                                                               |
| Steroid biosynthesis                        | 1/42 | 0.0016                 | 2.790 | 0.0049                 | 0.0017                | 0.0000 | Cholesterol ester(CE(16:1))                                                                                   |
| Glycolysis / Gluconeogenesis                | 1/26 | 0.0088                 | 2.054 | 0.0177                 | 0.0091                | 0.0002 | Triacylglycerol(TG(16:0/16:1/18:1), TG(16:0/16:1/18:2))                                                       |
| Glycerolipid metabolism                     | 1/16 | 0.0216                 | 1.665 | 0.0216                 | 0.0216                | 0.0140 | Triacylglycerol(TG(16:0/16:1/18:1), TG(16:0/16:1/18:2))                                                       |

Metabolites missing from pathway analysis (m = 40) : L-Carnitine, Butyrylcarnitine, L-Octanoylcarnitine, 2-Octenoylcarnitine, Decanoylcarnitine, 9-Decenoylcarnitine, Asymmetric dimethylarginine, Creatinine, CE(18:2), D-Glucose, CE(18:3), DG(14:0/18:1/0:0), DG(18:0/24:1/0:0), DG(18:1/24:1/0:0), DG(20:2/24:1/0:0), TG(14:0/14:0/16:1), TG(16:1/14:0/16:1), PC(15:1/22:2), PC(21:0/22:2), PC(21:0/22:6), PC(o-16:1/16:1), PC(o-18:1/16:0), PC(o-16:0/18:2), PC(o-16:1/18:2), PC(o-18:1/18:2), PC(o-16:0/20:4), PC(P-16:0/20:4), PC(o-37:6), PC(P-18:0/20:4), PC(o-16:0/22:6), PC(o-18:0/22:6), PC(P-18:0/22:6), PC(o-40:8), SM(d18:1/14:0), SM(34:2), SM(d18:1/17:0), SM(39:1), SM(d17:1/24:0), SM(d17:1/24:1), SM(d18:1/24:0)

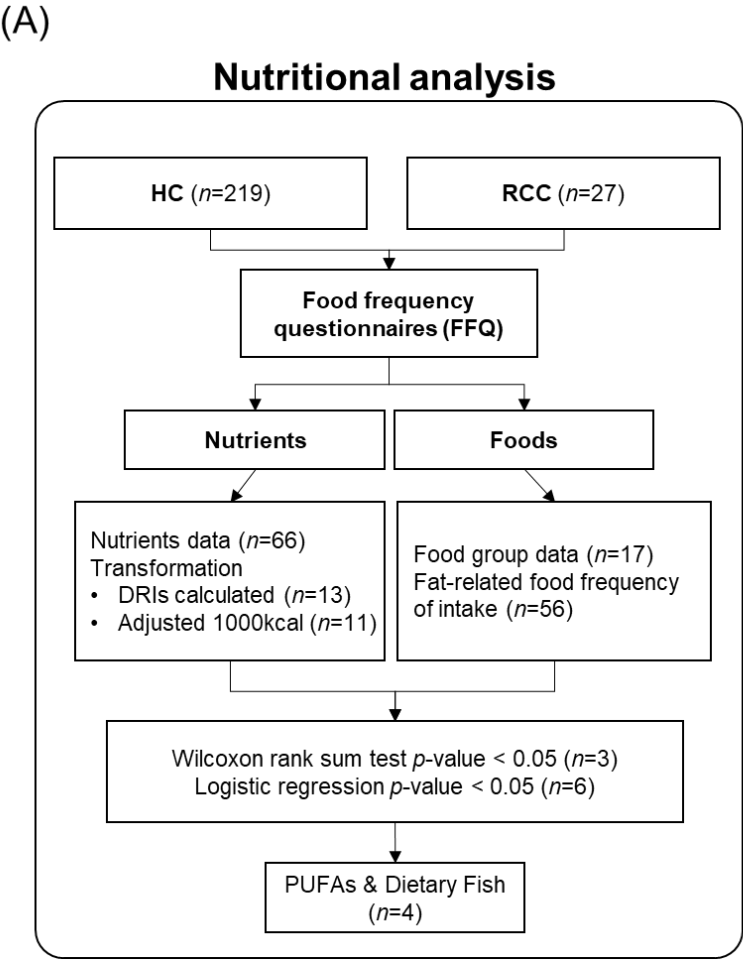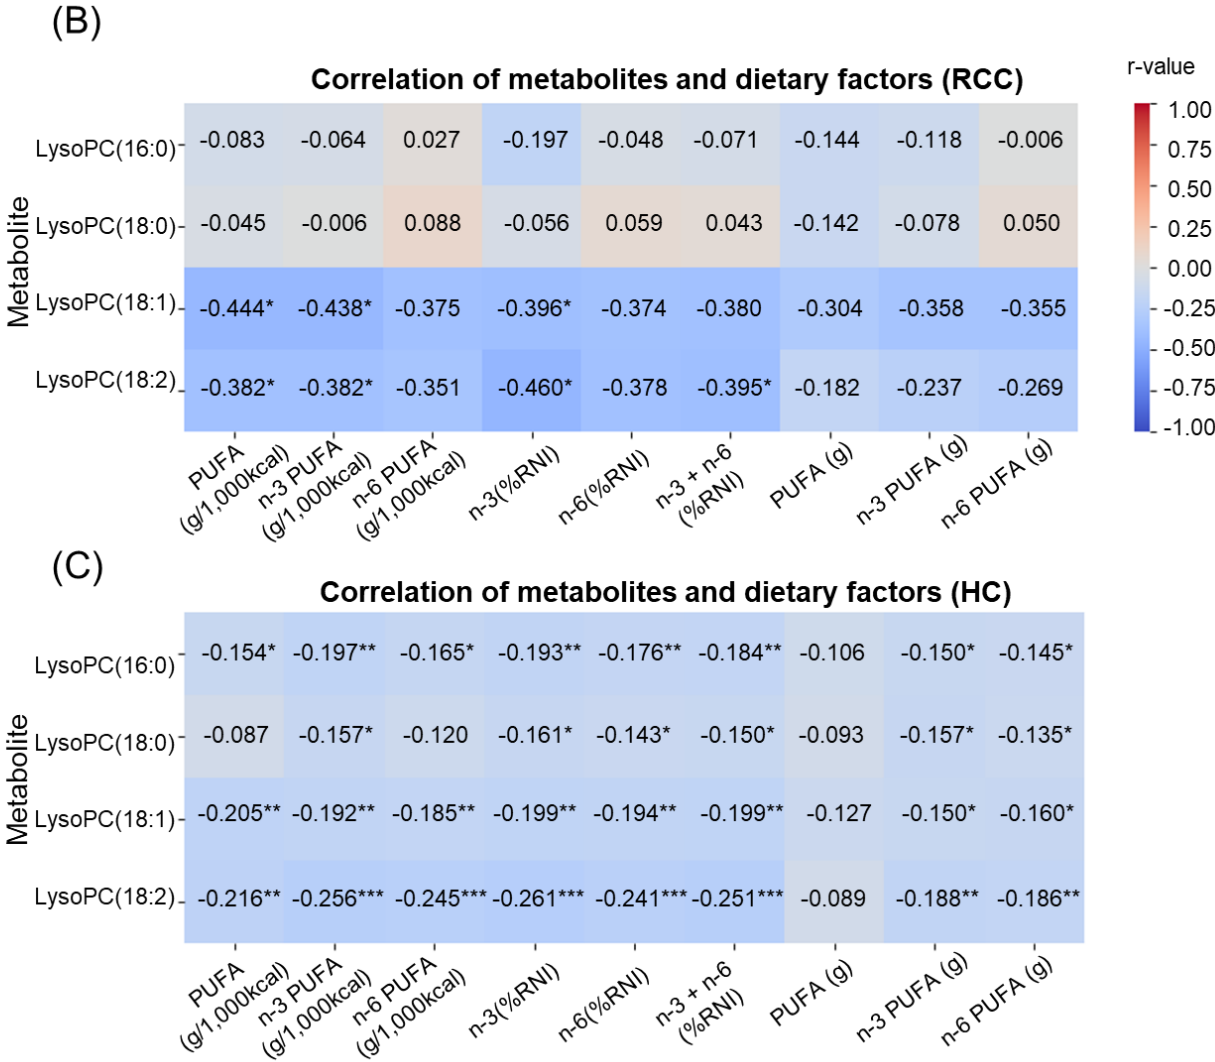

**Figure S3.** Correlation between LysoPC and PUFAs in each group and nutritional analysis flow chart. LysoPC, Lysophosphatidylcholine, PUFA, polyunsaturated fatty acid. \* $p < 0.05$ , \*\* $p < 0.01$ , \*\*\* $p < 0.001$
